# Supplementary material for: Human cell based directed evolution of adenine base editors with improved efficiency
Source: PubMed Central journal article supplement (PMC8501064; doi:10.1038/s41467-021-26211-0), 2021-10-08
Supplement: 41467_2021_26211_MOESM1_ESM.pdf [file 41467_2021_26211_MOESM1_ESM.pdf]

**Supplementary Information**  
**Human cell based directed evolution of adenine  
base editors with improved efficiency**

Junhao Fu<sup>1&</sup>, Qing Li<sup>2&</sup>, Xiaoyu Liu<sup>1&</sup>, Tianxiang Tu<sup>1&</sup>, Xiujuan Lv<sup>1</sup>, Jineng Lv<sup>1</sup>,  
Xidi Yin<sup>2</sup>, Zongming Song<sup>1,3</sup>, Jia Qu<sup>1</sup>, Jinwei Zhang<sup>4</sup>, Jinsong Li<sup>2\*</sup>, and Feng  
Gu<sup>1\*</sup>

<sup>1</sup>School of Ophthalmology and Optometry, Eye Hospital, Wenzhou Medical University, State Key Laboratory and Key Laboratory of Vision Science, Ministry of Health and Zhejiang Provincial Key Laboratory of Ophthalmology and Optometry, Wenzhou, Zhejiang, China

<sup>2</sup>State Key Laboratory of Cell Biology, Shanghai Key Laboratory of Molecular Andrology, Shanghai Institute of Biochemistry and Cell Biology, Center for Excellence in Molecular Cell Science, Chinese Academy of Sciences, Shanghai, China

<sup>3</sup>Henan Eye Hospital, Henan Eye Institute, Henan Provincial People's Hospital and People's Hospital of Zhengzhou University and People's Hospital of Henan University, Zhengzhou, Henan, China.

<sup>4</sup>Laboratory of Molecular Biology, National Institute of Diabetes and Digestive and Kidney Diseases, National Institutes of Health, Bethesda, Maryland, USA.

<sup>&</sup>These authors contributed equally to this work.

**\* Correspondence:**

Feng Gu, **E-mail:** [gufengw@gmail.com](mailto:gufengw@gmail.com), Jinsong Li, **E-mail:** [jsli@sibcb.ac.cn](mailto:jsli@sibcb.ac.cn)

| <b>Supplementary data</b> |                                                                                                                     |
|---------------------------|---------------------------------------------------------------------------------------------------------------------|
| Supplementary Figure 1    | Engineering <i>EGFP</i> gene for the optimization of ABE.                                                           |
| Supplementary Figure 2    | The fluorescence intensity of wild-type and engineered <i>EGFP</i> .                                                |
| Supplementary Figure 3    | Generation and screening of the libraries.                                                                          |
| Supplementary Figure 4    | The editing efficiencies of ABE variants at A12.                                                                    |
| Supplementary Figure 5    | Flow cytometric analysis showing boosted editing efficiency of three ABE variants.                                  |
| Supplementary Figure 6    | Schematic of NG-ABEmax variants structures.                                                                         |
| Supplementary Figure 7    | Comparison of the activity of NG-ABEmax and NG-ABEmax variants at endogenous genomic sites.                         |
| Supplementary Figure 8    | Variants harboring a strong basic residue at position 127 in TadA boosting the editing efficiency.                  |
| Supplementary Figure 9    | Editing efficiencies of NG-ABEmax-KR.                                                                               |
| Supplementary Figure 10   | Increased editing window of NG-ABEmax-KR at endogenous genomic sites.                                               |
| Supplementary Figure 11   | Sequence information of mice generated with NG-ABEmax-KR.                                                           |
| Supplementary Figure 12   | Editing efficiencies of NG-ABEmax or NG-ABEmax-KR in mouse embryos.                                                 |
| Supplementary Figure 13   | Off-target of NG-ABEmax and NG-ABEmax-KR at endogenous genomic sites.                                               |
| Supplementary Figure 14   | Off-target of NG-ABEmax and NG-ABEmax-KR at mouse <i>Try</i> gene.                                                  |
| Supplementary Figure 15   | Higher ratio of on-target to off-target editing of NG-ABEmax-KR at human endogenous gene and mouse <i>Try</i> gene. |
| Supplementary Figure 16   | RNA off-target editing of NG-ABEmax-KR and variants with two mutations (E59A in TadA, V106W in TadA*).              |
| Supplementary Figure 17   | Base editing efficiencies for sgRNA started with different first nucleotide.                                        |
| Supplementary Figure 18   | Activity, protein expression levels and nuclear localization of ABE variants.                                       |
| Supplementary Table 1     | Mutations information of randomly picked variants.                                                                  |
| Supplementary Table 2     | Summary of mutations information.                                                                                   |
| Supplementary Table 3     | No toxic effect of NG-ABEmax-KR for mouse development.                                                              |
| Supplementary Table 4     | Primers used to generate different EGFP variants.                                                                   |
| Supplementary Table 5     | Primers used to generate sgRNA plasmids targeting different sites of <i>dEGFP1</i> or <i>dEGFP2</i> .               |
| Supplementary Table 6     | Primers used to generate sgRNA plasmid targeting MCS site in the HEK293-PME cell line.                              |
| Supplementary Table 7     | Primers used to generate sgRNA plasmids targeting different genomic loci.                                           |
| Supplementary Table 8     | Primers used to identify key mutations for L1-60, L1-98 and L2-156.                                                 |
| Supplementary Table 9     | Primers used to generate NG-ABEmax-R <sup>127</sup> and NG-ABEmax H <sup>127</sup> .                                |
| Supplementary Table 10    | Primers used to generate 2 NG-ABEmax variants libraries.                                                            |
| Supplementary Table 11    | Primers used for fragments amplification.                                                                           |
| Supplementary Table 12    | Primers used for next-generation sequencing.                                                                        |
| Supplementary Table 13    | The raw screening data of Library 1.                                                                                |
| Supplementary Table 14    | The raw screening data of Library 2.                                                                                |

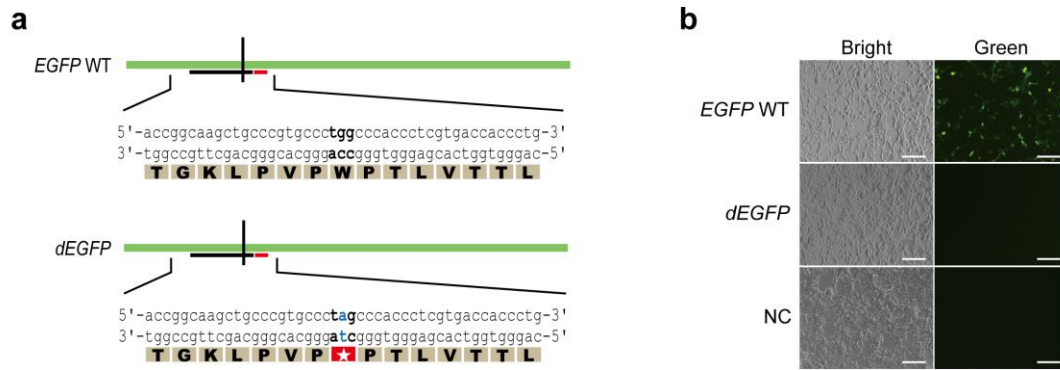

### Supplementary Fig. 1 Engineering *EGFP* gene for ABE optimization.

**a** A single base mutation introducing stop codon (TAG) to inactivate *EGFP*. The stop codon was highlighted with red star. **b** HEK-293 cells were transfected with dead *EGFP* encoding plasmids (200 ng), and images were obtained at 48 hr post-transfection. NC represents the negative control. Scale bar, 10  $\mu\text{m}$ .

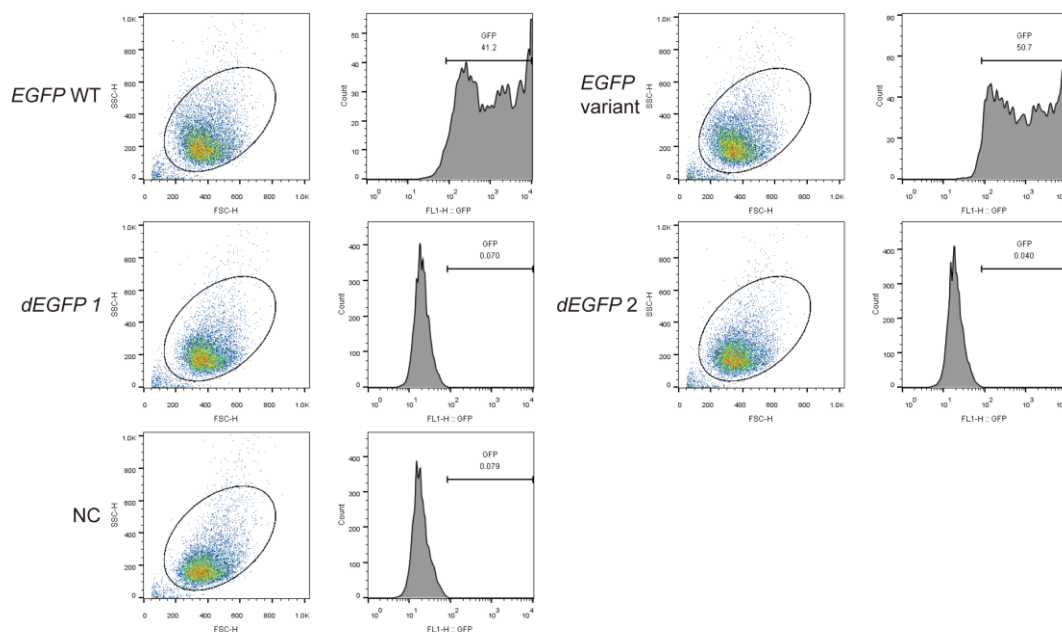

### Supplementary Fig. 2 The fluorescence intensity of wild-type and engineered *EGFP*.

The HEK-293 cells were transfected with the plasmids coding for *EGFP* (wild-type) and *EGFP* mutants. The flow cytometry analysis was performed to obtain the percent of *EGFP* positive cells.

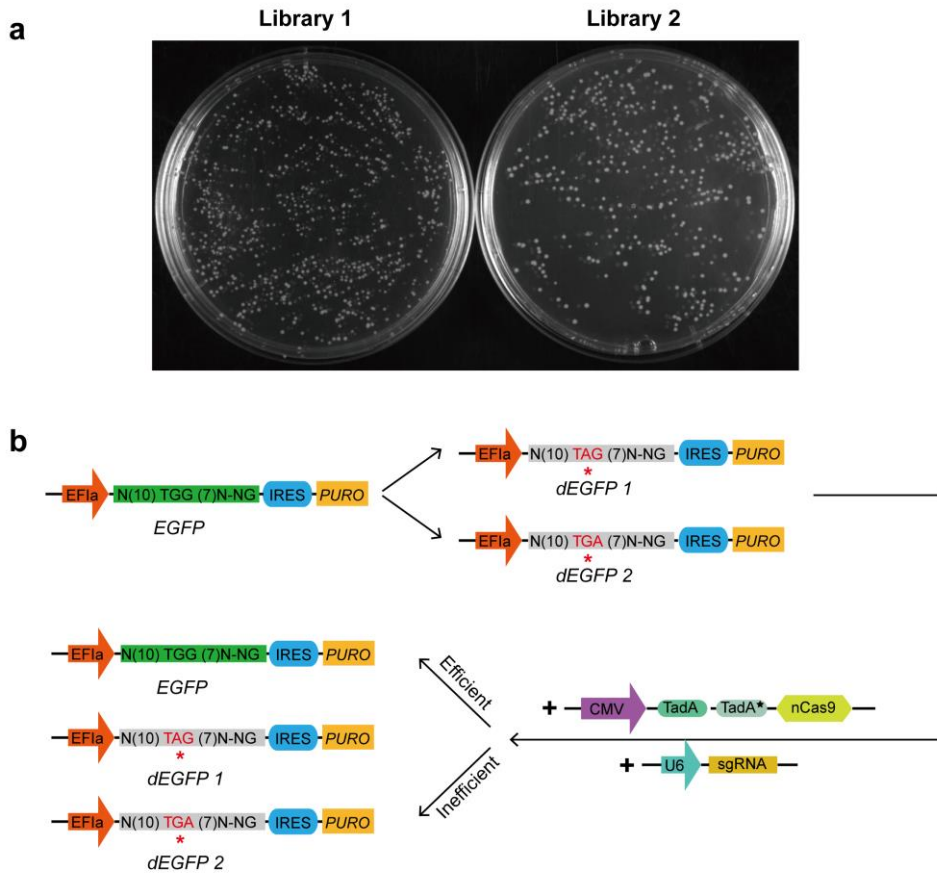

**Supplementary Fig. 3 Generation and screening of the libraries.**

**a** There are two libraries (library 1 and library 2) generated in this study. Each library contains two plates; here we only show one plate from each library. **b** The screening strategy of variants.

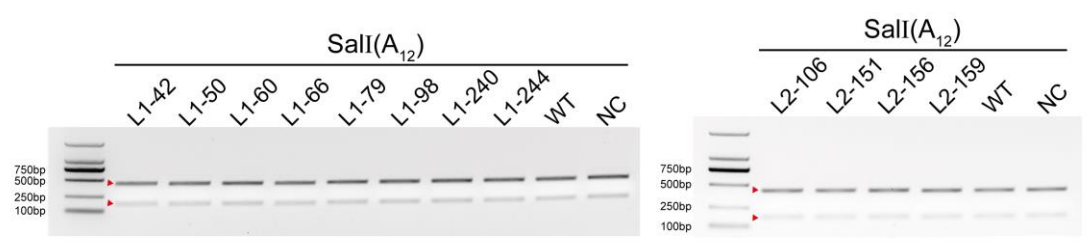

**Supplementary Fig. 4 The editing efficiencies of ABE variants at A12.**

Agarose gel electrophoresis results of testing editing efficiency of NG-ABEmax variants with SalI. Cleaved bands from SalI are labeled with red triangle. The amplicon is 606-bp. WT and NC represent wild-type NG-ABEmax and no plasmid, respectively.

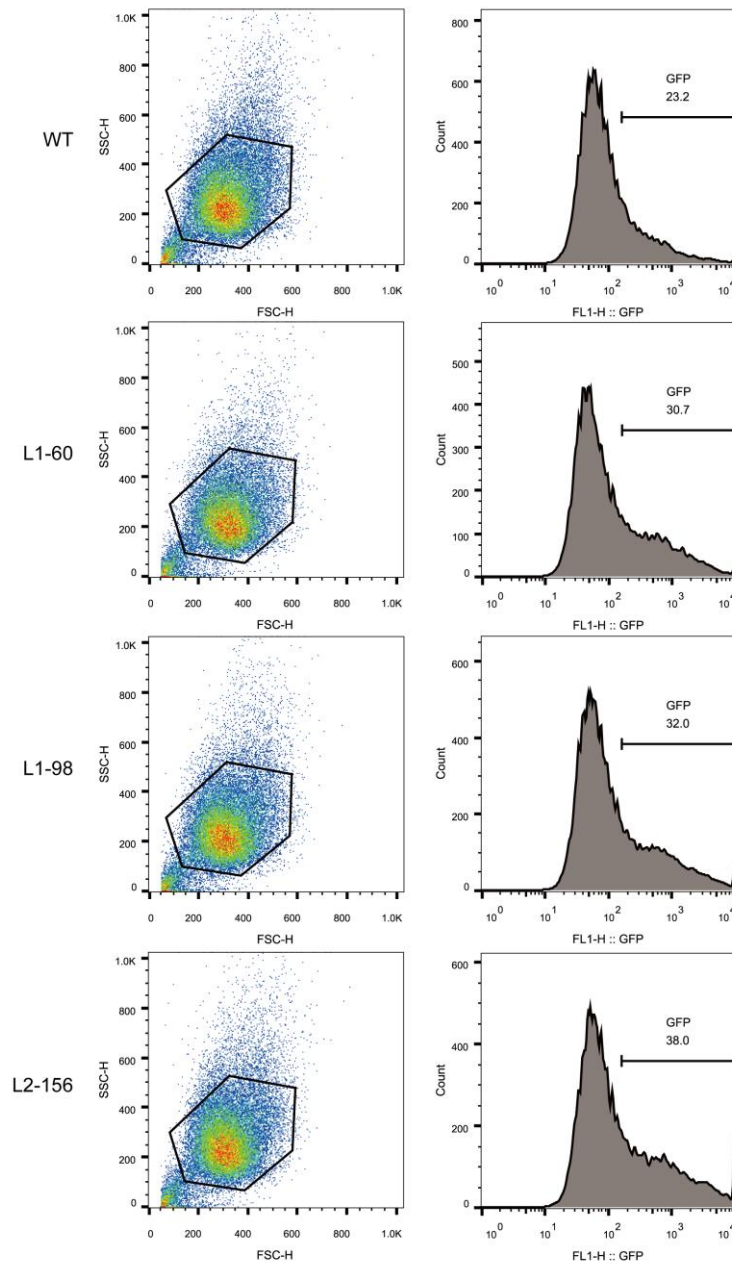

**Supplementary Fig. 5 Flow cytometric analysis showing boosted editing efficiency of three ABE variants.**

Flow cytometric analysis of three ABE variants at A7. GFP represents the positive signal (percentage).

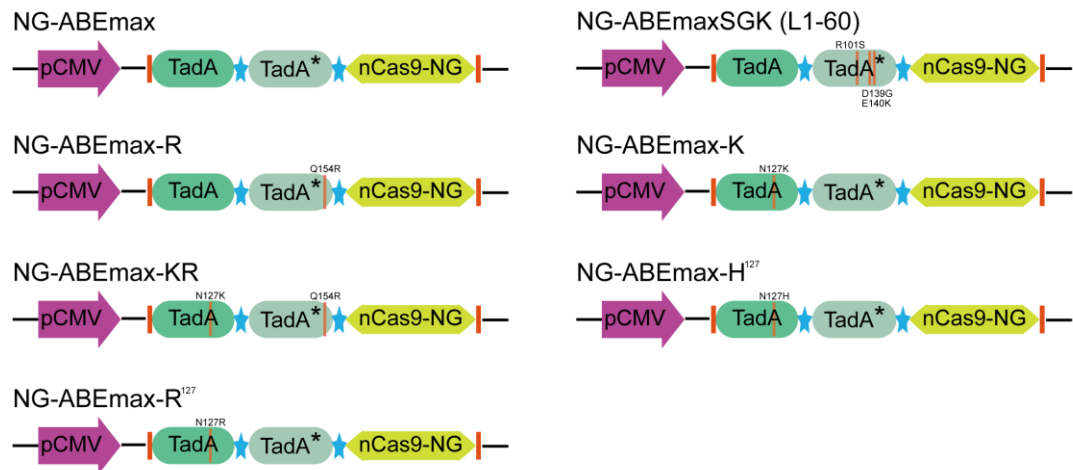

**Supplementary Fig. 6 Schematic of NG-ABEmax variants structures.**

Two small orange rectangular boxes and pentagams represent nuclear localization signals and 32-AA linkers, respectively.

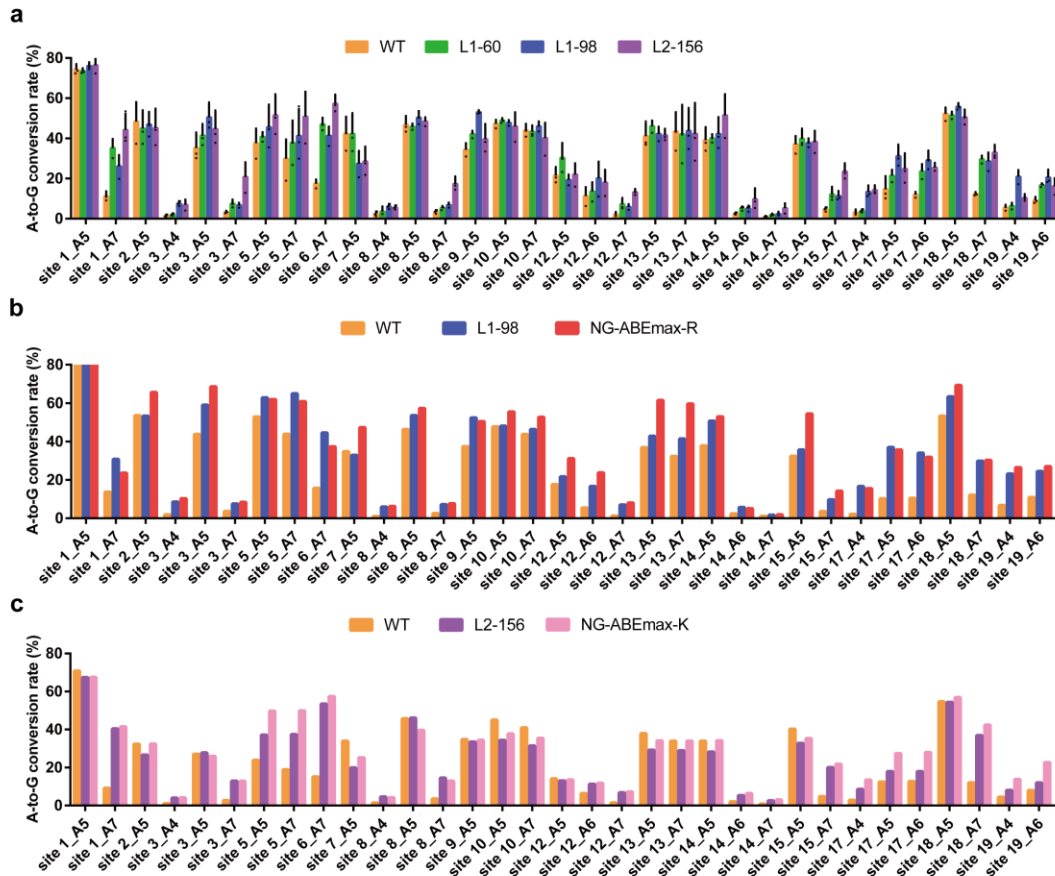

**Supplementary Fig. 7 Comparison of the activity of NG-ABEmax and NG-ABEmax variants at endogenous genomic sites.**

**a** Comparison of the activity of NG-ABEmax and NG-ABEmax variants (L1-60, L1-98, L2-156); Error bars indicate mean  $\pm$  s.d. ( $n=3$  independent experiments). **b** Comparison of the activity of NG-ABEmax, L1-98 and NG-ABEmax-R; **c** Comparison of the activity of NG-ABEmax, L2-156 and NG-ABEmax-K. WT represents wild-type NG-ABEmax.

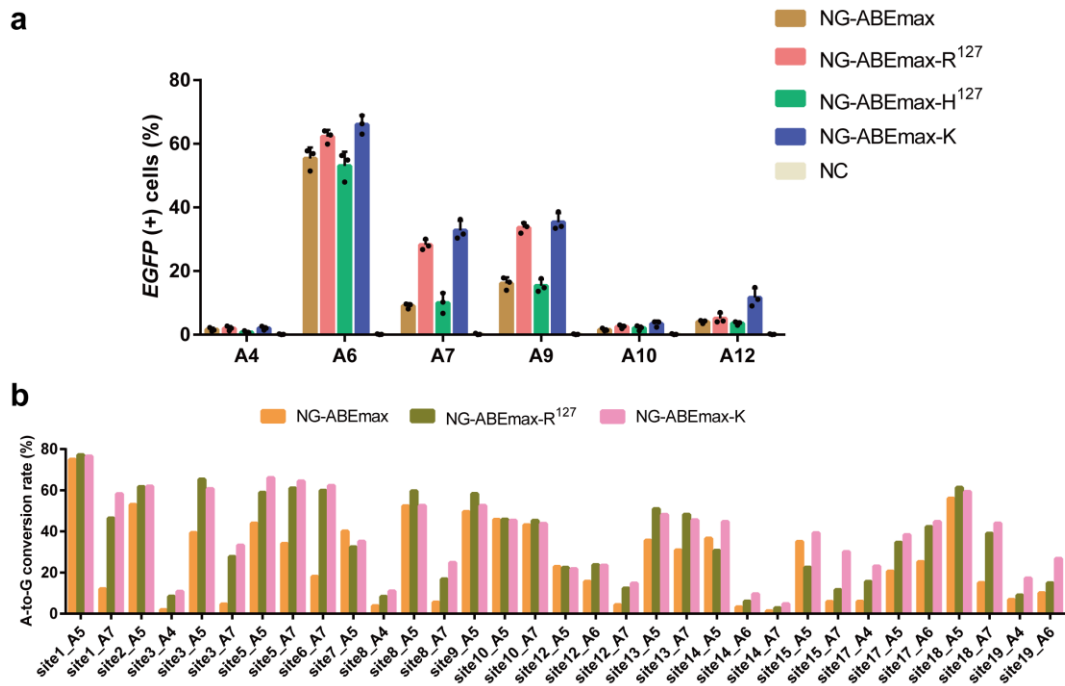

**Supplementary Fig. 8 Variants harboring a strong basic residue at position 127 in TadA boosting the editing efficiency.**

**a** The editing efficiencies of three variants harboring different basic residues (H, K and R) at position 127 in TadA via EGFP-based reporter system. EGFP positive cells were quantified by flow cytometry. NC represents the negative control. Error bars indicate mean  $\pm$  s.d. ( $n=3$  independent experiments). **b** The editing efficiencies of NG-ABEmax, NG-ABEmax-R<sup>127</sup> and NG-ABEmax-K and at endogenous genomic sites.

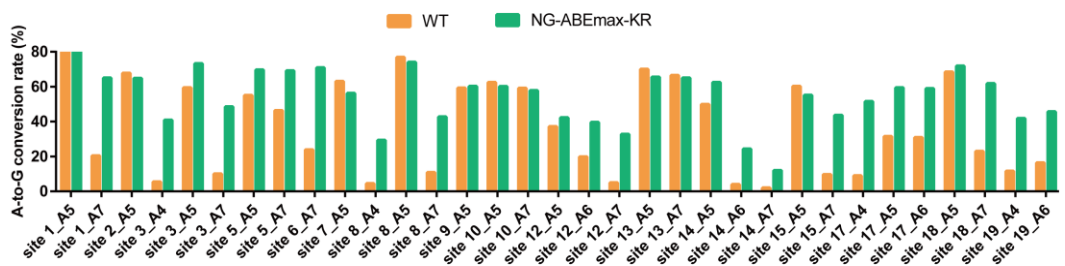

**Supplementary Fig. 9 Editing efficiencies of NG-ABEmax-KR.**

Boosted editing efficiencies of NG-ABEmax-KR at endogenous genomic sites.



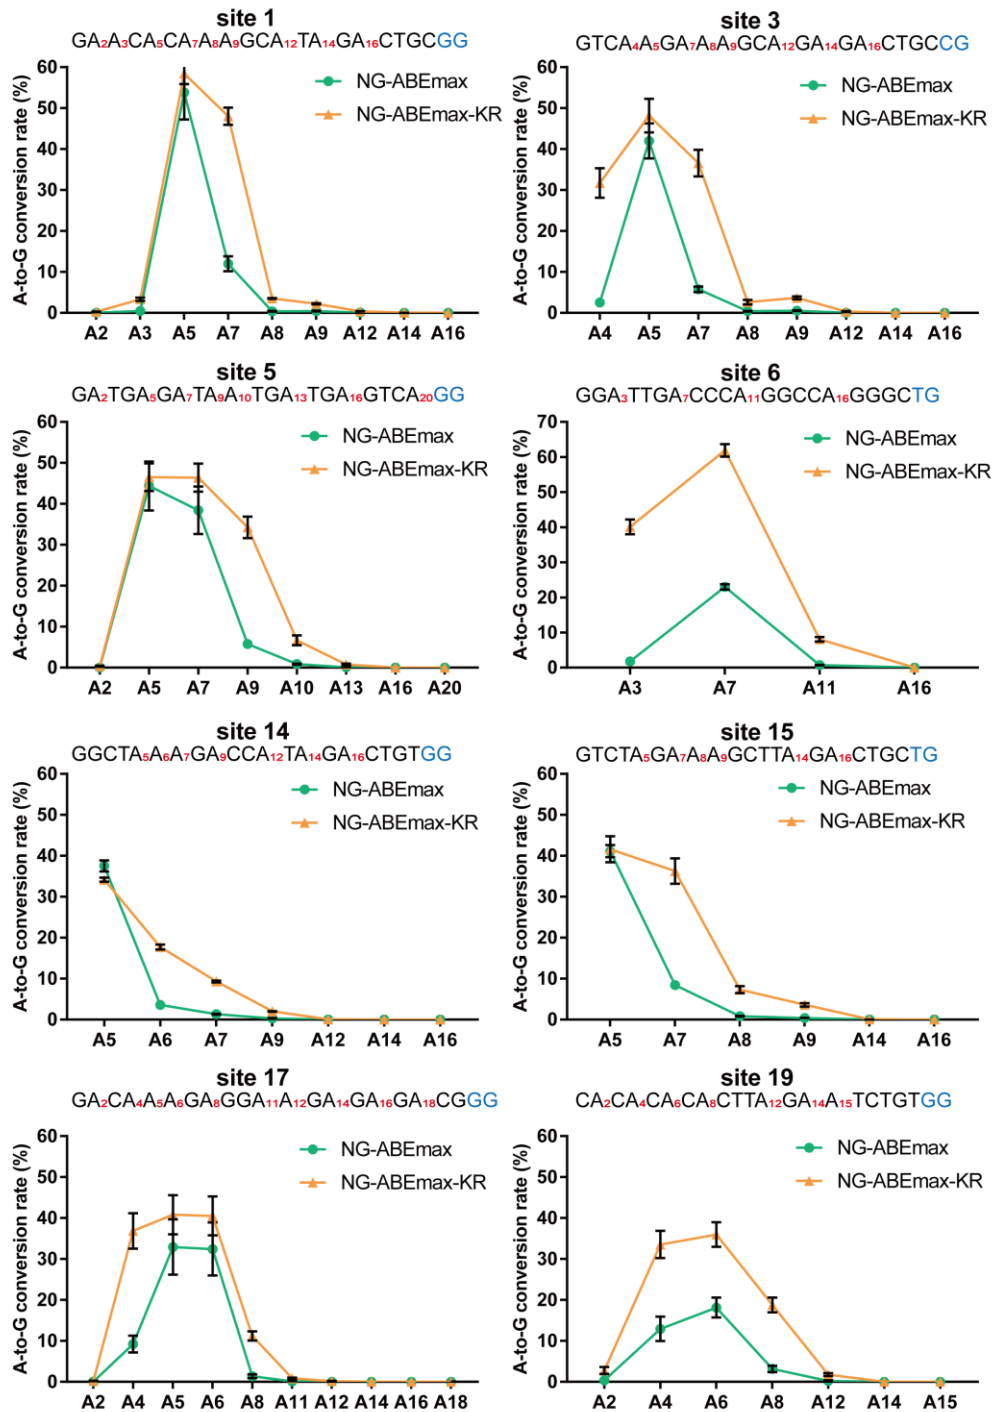

**Supplementary Fig. 10 Increased editing window of NG-ABEmax-KR at endogenous genomic sites.**

Summary of increased editing window of NG-ABEmax-KR in different endogenous genomic sites. Each A has been highlighted in red. PAM sequence is in blue. Error bars indicate mean  $\pm$  s.d. ( $n=3$  independent experiments).

|                                |                | 420                     | 421   | 422                   | 423 | 424 | 425 | 426 |               |  |
|--------------------------------|----------------|-------------------------|-------|-----------------------|-----|-----|-----|-----|---------------|--|
|                                |                | His                     | Asn   | Arg                   | Asp | Ser | Tyr | Met |               |  |
| <b>a</b>                       |                | CCATAACAGAGACTCTTACATGG |       |                       |     |     |     |     | Frequency (%) |  |
| <b>NG-ABE<sub>max</sub></b>    |                |                         |       |                       |     |     |     |     |               |  |
|                                | <i>Tyr</i> #1  | CCATGGCAGAGACTCTTACATGG | 48.61 | (N421G)               |     |     |     |     |               |  |
|                                |                | CCGTGGCAGAGACTCTTACATGG | 47.65 | (H420R, N421G)        |     |     |     |     |               |  |
|                                | <i>Tyr</i> #5  | CCGTGACGGAGACTCTTACATGG | 49.42 | (H420R, N421D, R422G) |     |     |     |     |               |  |
|                                |                | CCATGACAGAGACTCTTACATGG | 35.09 | (N421D)               |     |     |     |     |               |  |
|                                |                | CCGTGACAGAGACTCTTACATGG | 11.66 | (H420R, N421D)        |     |     |     |     |               |  |
|                                | <i>Tyr</i> #6  | CCGTGACAGAGACTCTTACATGG | 50.03 | (N420R, N421D)        |     |     |     |     |               |  |
|                                |                | CCGTGGCAGAGACTCTTACATGG | 46.60 | (H420R, N421G)        |     |     |     |     |               |  |
|                                | <i>Tyr</i> #7  | CCATGGCAGAGACTCTTACATGG | 97.25 | (N421G)               |     |     |     |     |               |  |
| <b>b</b>                       |                |                         |       |                       |     |     |     |     |               |  |
| <b>NG-ABE<sub>max</sub>-KR</b> |                |                         |       |                       |     |     |     |     |               |  |
|                                | <i>Tyr</i> #2  | CCGTGGCGGAGACTCTTACATGG | 86.2  | (H420R, N421G, R422G) |     |     |     |     |               |  |
|                                |                | CCGTGGCAGAGACTCTTACATGG | 7.05  | (H420R, N421G)        |     |     |     |     |               |  |
|                                | <i>Tyr</i> #3  | CCGTGGCGGAGACTCTTACATGG | 72.77 | (H420R, N421G, R422G) |     |     |     |     |               |  |
|                                |                | CCGTGGCAGAGACTCTTACATGG | 20.62 | (H420R, N421G)        |     |     |     |     |               |  |
|                                | <i>Tyr</i> #10 | CCGTGGCGGAGACTCTTACATGG | 48.32 | (H420R, N421G, R422G) |     |     |     |     |               |  |
|                                |                | CCATGGCAGAGACTCTTACATGG | 45.95 | (N421G)               |     |     |     |     |               |  |

**Supplementary Fig. 11 Sequence information of mice generated with NG-ABE<sub>max</sub>-KR.**

The *Tyr* gene information from each mouse was obtained from next-generation sequencing. The ID of mice was labeled with *Tyr* #. The predicted partial proteins information has been provided in the brackets. Editing information of NG-ABE<sub>max</sub>(a) and NG-ABE<sub>max</sub>-KR(b).

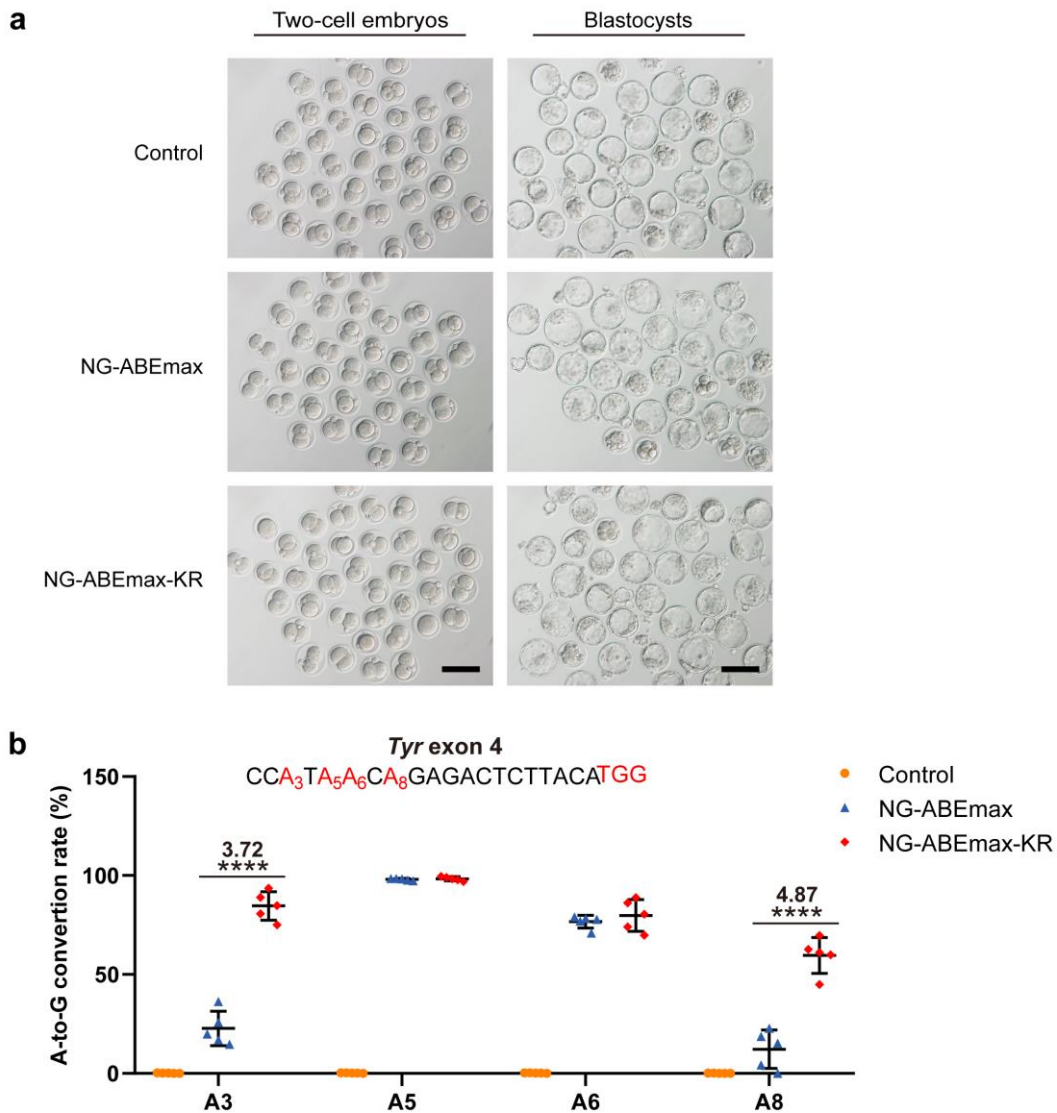

**Supplementary Fig. 12 Editing efficiencies of NG-ABEmax or NG-ABEmax-KR in mouse embryos.**

**a** Images of pre-implantation embryos obtained by injection of NG-ABEmax or NG-ABEmax-KR mRNA and sgRNA to target Tyr into zygotes. Control represents only ddH<sub>2</sub>O injection. Scale bar, 100  $\mu$ m. **b** Statistical analysis of on-target A-to-G base conversions induced by NG-ABEmax or NG-ABEmax-KR in all blastocysts. Total embryos from each group were randomly divided into five groups; Data are mean  $\pm$  s.d. for five groups of blastocysts. Each A base was highlighted in red. \*\*\*\* $P < 0.0001$  by Student's unpaired two-sided t-test. Exact  $P$  value of A3 = 0.000002, exact  $P$  value of A8 = 0.000044.

|          |              | A-to-G conversion rate (%) |      |      |       |       |       |       |       |      |   |   |      |   |      |      |      |   |      |     |      |
|----------|--------------|----------------------------|------|------|-------|-------|-------|-------|-------|------|---|---|------|---|------|------|------|---|------|-----|------|
|          |              | G                          | A2   | A3   | C     | A5    | C     | A7    | A8    | A9   | G | C | A12  | T | A14  | G    | A16  | C | T    | G   | C    |
| HEK2     | NG-ABEmax    | 0.04                       | 0.43 |      |       | 47.98 |       | 11.11 | 0.48  | 0.44 |   |   | 0.08 |   | 0.03 |      | 0.01 |   |      |     |      |
|          | NG-ABEmax-KR | 0.16                       | 2.27 |      |       | 48.18 |       | 36.77 | 2.35  | 1.5  |   |   | 0.2  |   | 0.04 |      | 0.02 |   |      |     |      |
|          | NC           | 0.01                       | 0.07 |      |       | 2.07  |       | 1.63  | 0.12  | 0.05 |   |   | 0.02 |   | 0.01 |      | 0.01 |   |      |     |      |
|          |              | A-to-G conversion rate (%) |      |      |       |       |       |       |       |      |   |   |      |   |      |      |      |   |      |     |      |
|          |              | G                          | A2   | A3   | C     | A5    | C     | A7    | A8    | T    | G | C | A12  | T | A14  | G    | A16  | T | T    | G   | C    |
| HEK2-OT1 | NG-ABEmax    | 0.02                       | 0.02 |      |       |       |       | 0.01  | 0.01  |      |   |   | 0.01 |   | 0.01 |      | 0.01 |   |      |     |      |
|          | NG-ABEmax-KR | 0.02                       | 0.02 |      |       | 0.06  |       | 0.02  | 0.01  |      |   |   | 0.01 |   | 0.01 |      | 0.01 |   |      |     |      |
|          | NC           | 0.01                       | 0.01 |      |       | 0.01  |       | 0.01  | 0.01  |      |   |   | 0.02 |   | 0.01 |      | 0.01 |   |      |     |      |
|          |              | A-to-G conversion rate (%) |      |      |       |       |       |       |       |      |   |   |      |   |      |      |      |   |      |     |      |
|          |              | A1                         | A2   | A3   | C     | A5    | T     | A7    | A8    | A9   | G | C | A12  | T | A14  | G    | A16  | C | T    | G   | C    |
| HEK2-OT2 | NG-ABEmax    | 0.01                       | 0.01 | 0.01 |       | 2.75  |       | 0.2   | 0.02  | 0.03 |   |   | 0.01 |   | 0.01 |      | 0.01 |   |      |     |      |
|          | NG-ABEmax-KR | 0.01                       | 0.01 | 0.06 |       | 5.57  |       | 1.67  | 0.05  | 0.05 |   |   | 0.02 |   | 0.02 |      | 0.01 |   |      |     |      |
|          | NC           | 0.01                       | 0.01 | 0.01 |       | 0.01  |       | 0.01  | 0.02  | 0.02 |   |   | 0.01 |   | 0.01 |      | 0.01 |   |      |     |      |
|          |              | A-to-G conversion rate (%) |      |      |       |       |       |       |       |      |   |   |      |   |      |      |      |   |      |     |      |
|          |              | G                          | G    | C    | C     | C     | A6    | G     | A8    | C    | T | G | A12  | G | C    | A15  | C    | G | T    | G   | A20  |
| HEK3     | NG-ABEmax    |                            |      |      |       |       | 14.32 |       | 1.37  |      |   |   | 0.11 |   |      | 0.02 |      |   |      |     | 0.03 |
|          | NG-ABEmax-KR |                            |      |      |       |       | 40.37 |       | 17.48 |      |   |   | 0.65 |   |      | 0.01 |      |   |      |     | 0.01 |
|          | NC           |                            |      |      |       |       | 0.02  |       | 0.02  |      |   |   | 0.03 |   |      | 0.01 |      |   |      |     | 0.02 |
|          |              | A-to-G conversion rate (%) |      |      |       |       |       |       |       |      |   |   |      |   |      |      |      |   |      |     |      |
|          |              | C                          | A2   | C    | C     | C     | A6    | G     | A8    | C    | T | G | A12  | G | C    | A15  | C    | G | T    | G   | C    |
| HEK3-OT1 | NG-ABEmax    | 0.01                       |      |      |       |       | 0.02  |       | 0.02  |      |   |   | 0.03 |   |      | 0.01 |      |   |      |     |      |
|          | NG-ABEmax-KR | 0.01                       |      |      |       |       | 0.03  |       | 0.04  |      |   |   | 0.02 |   |      | 0.01 |      |   |      |     |      |
|          | NC           | 0.01                       |      |      |       |       | 0.01  |       | 0.01  |      |   |   | 0.02 |   |      | 0    |      |   |      |     | 0    |
|          |              | A-to-G conversion rate (%) |      |      |       |       |       |       |       |      |   |   |      |   |      |      |      |   |      |     |      |
|          |              | G                          | A2   | C    | A4    | C     | A6    | G     | A8    | C    | C | G | G    | C | A15  | C    | G    | T | G    | A20 |      |
| HEK3-OT2 | NG-ABEmax    | 0.01                       | 0.01 |      | 0.01  |       | 0.03  |       | 0.01  |      |   |   | 0.01 |   |      | 0.01 |      |   |      |     | 0.02 |
|          | NG-ABEmax-KR | 0.01                       |      |      | 0.02  |       | 0.03  |       | 0.01  |      |   |   |      |   |      | 0    |      |   |      |     | 0.02 |
|          | NC           | 0.01                       |      |      | 0.01  |       | 0.02  |       | 0.01  |      |   |   |      |   |      | 0.01 |      |   |      |     | 0.02 |
|          |              | A-to-G conversion rate (%) |      |      |       |       |       |       |       |      |   |   |      |   |      |      |      |   |      |     |      |
|          |              | A1                         | G    | A3   | C     | C     | A6    | G     | A8    | C    | T | G | A12  | G | C    | A15  | A16  | G | A18  | G   | A20  |
| HEK3-OT3 | NG-ABEmax    | 0.02                       |      | 0.03 |       |       | 0.02  |       | 0.02  |      |   |   | 0.61 |   |      | 0.01 | 0.01 |   | 0.02 |     | 0.52 |
|          | NG-ABEmax-KR | 0.01                       |      | 0.04 |       |       | 0.02  |       | 0.02  |      |   |   | 0.41 |   |      | 0.01 | 0.02 |   | 0.02 |     | 0.35 |
|          | NC           | 0.01                       |      | 0.03 |       |       | 0.02  |       | 0.02  |      |   |   | 0.19 |   |      | 0.02 | 0.01 |   | 0.02 |     | 0.14 |
|          |              | A-to-G conversion rate (%) |      |      |       |       |       |       |       |      |   |   |      |   |      |      |      |   |      |     |      |
|          |              | G                          | A2   | G    | C     | C     | A6    | G     | A8    | A9   | T | G | A12  | G | C    | A15  | C    | G | T    | G   | A20  |
| HEK3-OT4 | NG-ABEmax    | 0.03                       |      |      |       |       | 0.01  |       | 0.01  | 0.01 |   |   | 0.05 |   |      | 0.01 |      |   |      |     | 0.05 |
|          | NG-ABEmax-KR | 0.02                       |      |      |       |       | 0.01  |       | 0.01  | 0.01 |   |   | 0.04 |   |      | 0.01 |      |   |      |     | 0.04 |
|          | NC           | 0.02                       |      |      |       |       | 0.01  |       | 0.01  | 0.01 |   |   | 0.04 |   |      | 0.01 |      |   |      |     | 0.04 |
|          |              | A-to-G conversion rate (%) |      |      |       |       |       |       |       |      |   |   |      |   |      |      |      |   |      |     |      |
|          |              | G                          | G    | C    | A4    | C     | T     | G     | C     | G    | G | C | T    | G | G    | A15  | G    | G | T    | G   | G    |
| HEK4     | NG-ABEmax    |                            |      |      | 3.76  |       |       |       |       |      |   |   |      |   |      | 0    |      |   |      |     |      |
|          | NG-ABEmax-KR |                            |      |      | 33.22 |       |       |       |       |      |   |   |      |   |      | 0    |      |   |      |     |      |
|          | NC           |                            |      |      | 1.36  |       |       |       |       |      |   |   |      |   |      | 0    |      |   |      |     |      |
|          |              | A-to-G conversion rate (%) |      |      |       |       |       |       |       |      |   |   |      |   |      |      |      |   |      |     |      |
|          |              | T                          | G    | C    | A4    | C     | T     | G     | C     | G    | G | C | C    | G | G    | A15  | G    | G | A18  | G   | G    |
| HEK4-OT1 | NG-ABEmax    | 0.34                       |      |      |       |       |       |       |       |      |   |   | 0.03 |   |      | 0.03 |      |   | 0.03 |     |      |
|          | NG-ABEmax-KR |                            |      |      | 3.63  |       |       |       |       |      |   |   | 0.03 |   |      |      |      |   | 0.03 |     |      |
|          | NC           |                            |      |      | 0.06  |       |       |       |       |      |   |   | 0.02 |   |      |      |      |   | 0.02 |     |      |
|          |              | A-to-G conversion rate (%) |      |      |       |       |       |       |       |      |   |   |      |   |      |      |      |   |      |     |      |
|          |              | G                          | G    | C    | T     | C     | T     | G     | C     | G    | G | C | T    | G | G    | A15  | G    | G | G    | G   | G    |
| HEK4-OT2 | NG-ABEmax    |                            |      |      |       |       |       |       |       |      |   |   |      |   |      | 0.03 |      |   |      |     |      |
|          | NG-ABEmax-KR |                            |      |      |       |       |       |       |       |      |   |   |      |   |      | 0.02 |      |   |      |     |      |
|          | NC           |                            |      |      |       |       |       |       |       |      |   |   |      |   |      | 0.02 |      |   |      |     |      |
|          |              | A-to-G conversion rate (%) |      |      |       |       |       |       |       |      |   |   |      |   |      |      |      |   |      |     |      |
|          |              | G                          | G    | C    | A4    | T     | C     | A7    | C     | G    | G | C | T    | G | G    | A15  | G    | G | T    | G   | G    |
| HEK4-OT3 | NG-ABEmax    |                            |      |      | 0.31  |       |       | 0.74  |       |      |   |   |      |   |      | 0.04 |      |   |      |     |      |
|          | NG-ABEmax-KR |                            |      |      | 4.69  |       |       | 4.36  |       |      |   |   |      |   |      | 0.04 |      |   |      |     |      |
|          | NC           |                            |      |      | 0.01  |       |       | 0.06  |       |      |   |   |      |   |      | 0.03 |      |   |      |     |      |
|          |              | A-to-G conversion rate (%) |      |      |       |       |       |       |       |      |   |   |      |   |      |      |      |   |      |     |      |
|          |              | G                          | G    | C    | G     | C     | T     | G     | C     | G    | G | C | G    | G | A15  | G    | G    | T | G    | G   |      |
| HEK4-OT4 | NG-ABEmax    |                            |      |      |       |       |       |       |       |      |   |   |      |   | 0.01 |      |      |   |      |     |      |
|          | NG-ABEmax-KR |                            |      |      |       |       |       |       |       |      |   |   |      |   | 0.03 |      |      |   |      |     |      |
|          | NC           |                            |      |      |       |       |       |       |       |      |   |   |      |   | 0.02 |      |      |   |      |     |      |

**Supplementary Fig. 13 Off-target of NG-ABEmax and NG-ABEmax-KR at endogenous genomic sites.**

There are three target sites (HEK2, HEK3 and HEK4) and corresponding off-target sites (labeled with OT#) were selected for off-target test. On-target and off-target editing efficiencies are in blue and red, respectively. Median values are shown, generated from  $n=3$  biological replicate.

|                 | A-to-G conversion rate (%) |   |       |       |    |    |       |    |       |     |   |     |      |   |   |   |   |     |      |      |
|-----------------|----------------------------|---|-------|-------|----|----|-------|----|-------|-----|---|-----|------|---|---|---|---|-----|------|------|
|                 | C                          | C | A3    | T     | A5 | A6 | C     | A8 | G     | A10 | G | A12 | C    | T | C | T | T | A18 | C    | A20  |
| Tyr exon 4      |                            |   |       |       |    |    |       |    |       |     |   |     |      |   |   |   |   |     |      |      |
| NG-ABEmax-1     | 48.91                      |   | 99.95 | 99.69 |    |    | 0.16  |    | 0.07  |     |   |     | 0.01 |   |   |   |   |     | 0.01 | 0.01 |
| NG-ABEmax-2     | 48.54                      |   | 99.96 | 99.71 |    |    | 0.09  |    | 0.05  |     |   |     | 0.01 |   |   |   |   |     | 0.01 | 0.01 |
| NG-ABEmax-3     | 99.02                      |   | 99.02 | 99.02 |    |    | 57.84 |    | 0.98  |     |   |     | 0    |   |   |   |   |     | 0    | 0    |
| NG-ABEmax-4     | 99.84                      |   | 99.96 | 50.97 |    |    | 0.04  |    | 0.02  |     |   |     | 0.01 |   |   |   |   |     | 0.01 | 0.01 |
| NG-ABEmax-5     | 9.65                       |   | 99.82 | 91.38 |    |    | 1.25  |    | 0.07  |     |   |     | 0.01 |   |   |   |   |     | 0.01 | 0.01 |
| NG-ABEmax-6     | 63.65                      |   | 99.95 | 0.82  |    |    | 51.45 |    | 0.04  |     |   |     | 0.01 |   |   |   |   |     | 0.01 | 0.01 |
| NG-ABEmax-7     | 49.25                      |   | 99.93 | 5.01  |    |    | 0.91  |    | 4.1   |     |   |     | 0.02 |   |   |   |   |     | 0.01 | 0.01 |
| NG-ABEmax-8     | 40.23                      |   | 99.9  | 60.04 |    |    | 31.33 |    | 0.07  |     |   |     | 0.01 |   |   |   |   |     | 0.01 | 0.01 |
| NG-ABEmax-9     | 15.34                      |   | 99.92 | 67.29 |    |    | 0.33  |    | 0.04  |     |   |     | 0.01 |   |   |   |   |     | 0.01 | 0.01 |
| NG-ABEmax-10    | 49.22                      |   | 99.81 | 99.74 |    |    | 48.91 |    | 0.14  |     |   |     | 0.03 |   |   |   |   |     | 0.01 | 0.01 |
| NG-ABEmax-KR-1  | 77.37                      |   | 99.92 | 96.04 |    |    | 44.76 |    | 21.06 |     |   |     | 0    |   |   |   |   |     | 0    | 0    |
| NG-ABEmax-KR-2  | 99.5                       |   | 99.97 | 99.56 |    |    | 99.04 |    | 48.37 |     |   |     | 0.01 |   |   |   |   |     | 0.01 | 0.01 |
| NG-ABEmax-KR-3  | 99.06                      |   | 99.77 | 99.29 |    |    | 45.7  |    | 39    |     |   |     | 0.01 |   |   |   |   |     | 0.01 | 0.01 |
| NG-ABEmax-KR-4  | 99.11                      |   | 99.84 | 99.46 |    |    | 82.42 |    | 0.09  |     |   |     | 0.01 |   |   |   |   |     | 0.01 | 0.01 |
| NG-ABEmax-KR-5  | 98.05                      |   | 98.39 | 94.99 |    |    | 25.51 |    | 0.68  |     |   |     | 0.17 |   |   |   |   |     | 0    | 0.01 |
| NG-ABEmax-KR-6  | 99.08                      |   | 99.18 | 98.96 |    |    | 52.83 |    | 0.26  |     |   |     | 0.11 |   |   |   |   |     | 0.01 | 0.01 |
| NG-ABEmax-KR-7  | 99.15                      |   | 99.29 | 99.16 |    |    | 95.64 |    | 0.45  |     |   |     | 0.12 |   |   |   |   |     | 0.01 | 0.01 |
| NG-ABEmax-KR-8  | 99.17                      |   | 99.31 | 99.15 |    |    | 75.3  |    | 0.35  |     |   |     | 0.08 |   |   |   |   |     | 0.01 | 0.01 |
| NG-ABEmax-KR-9  | 25.71                      |   | 99.02 | 98.88 |    |    | 86.55 |    | 0.44  |     |   |     | 0.17 |   |   |   |   |     | 0.01 | 0.01 |
| NG-ABEmax-KR-10 | 77.84                      |   | 83.48 | 83.4  |    |    | 83.11 |    | 0.59  |     |   |     | 0.12 |   |   |   |   |     | 0.01 | 0.01 |

|                 | A-to-G conversion rate (%) |   |              |              |    |    |              |    |             |     |   |     |      |   |   |   |   |     |   |      |
|-----------------|----------------------------|---|--------------|--------------|----|----|--------------|----|-------------|-----|---|-----|------|---|---|---|---|-----|---|------|
|                 | T                          | T | A3           | T            | A5 | A6 | C            | A8 | G           | A10 | G | A12 | C    | T | C | T | T | A18 | C | T    |
| Off target-1    |                            |   |              |              |    |    |              |    |             |     |   |     |      |   |   |   |   |     |   |      |
| NG-ABEmax-1     | 0.01                       |   | 0.01         | 0.01         |    |    | 0.01         |    | 0.01        |     |   |     | 0.01 |   |   |   |   |     |   | 0.02 |
| NG-ABEmax-2     | 0.01                       |   | 0.01         | 0.01         |    |    | 0.01         |    | 0.01        |     |   |     | 0.01 |   |   |   |   |     |   | 0.03 |
| NG-ABEmax-3     | 0.01                       |   | 0.01         | 0.01         |    |    | 0.01         |    | 0.01        |     |   |     | 0.01 |   |   |   |   |     |   | 0.02 |
| NG-ABEmax-4     | 0                          |   | 0.01         | 0.01         |    |    | 0.01         |    | 0.01        |     |   |     | 0.01 |   |   |   |   |     |   | 0.02 |
| NG-ABEmax-5     | 0.01                       |   | <b>41.82</b> | <b>41.84</b> |    |    | <b>41.83</b> |    | 0.01        |     |   |     | 0.01 |   |   |   |   |     |   | 0.02 |
| NG-ABEmax-6     | 0                          |   | 0.06         | 0.06         |    |    | 0.05         |    | 0.01        |     |   |     | 0.01 |   |   |   |   |     |   | 0.02 |
| NG-ABEmax-7     | 0.01                       |   | 0.01         | 0.01         |    |    | 0.01         |    | 0.02        |     |   |     | 0.01 |   |   |   |   |     |   | 0.03 |
| NG-ABEmax-8     | 0                          |   | 0.01         | 0.01         |    |    | 0.01         |    | 0.02        |     |   |     | 0.01 |   |   |   |   |     |   | 0.03 |
| NG-ABEmax-9     | <b>20.2</b>                |   | <b>51.92</b> | <b>0.03</b>  |    |    | <b>72.2</b>  |    | <b>0.02</b> |     |   |     | 0.01 |   |   |   |   |     |   | 0.02 |
| NG-ABEmax-10    | <b>25.13</b>               |   | <b>26.32</b> | <b>0.05</b>  |    |    | <b>26.34</b> |    | <b>0.01</b> |     |   |     | 0.01 |   |   |   |   |     |   | 0.02 |
| NG-ABEmax-KR-1  | 0                          |   | 0.13         | 0.01         |    |    | 0.07         |    | 0.01        |     |   |     | 0.01 |   |   |   |   |     |   | 0.02 |
| NG-ABEmax-KR-2  | 0.01                       |   | <b>38.21</b> | <b>0.02</b>  |    |    | <b>38.07</b> |    | 0.01        |     |   |     | 0.01 |   |   |   |   |     |   | 0.02 |
| NG-ABEmax-KR-3  | 0.01                       |   | <b>42.05</b> | <b>0.02</b>  |    |    | <b>0.05</b>  |    | 0.01        |     |   |     | 0.01 |   |   |   |   |     |   | 0.02 |
| NG-ABEmax-KR-4  | 0                          |   | 0            | 0.01         |    |    | 0.01         |    | 0.01        |     |   |     | 0.01 |   |   |   |   |     |   | 0.02 |
| NG-ABEmax-KR-5  | 0.01                       |   | 0.02         | 0.02         |    |    | 0.02         |    | 0.01        |     |   |     | 0    |   |   |   |   |     |   | 0.02 |
| NG-ABEmax-KR-6  | 0.01                       |   | 0.01         | 0.01         |    |    | 0.01         |    | 0.01        |     |   |     | 0.01 |   |   |   |   |     |   | 0.01 |
| NG-ABEmax-KR-7  | 0.01                       |   | 0.01         | <b>4.15</b>  |    |    | 0.01         |    | 0.01        |     |   |     | 0.01 |   |   |   |   |     |   | 0.02 |
| NG-ABEmax-KR-8  | 0.01                       |   | 0.01         | 0.01         |    |    | 0.01         |    | 0.01        |     |   |     | 0.01 |   |   |   |   |     |   | 0.02 |
| NG-ABEmax-KR-9  | 0.01                       |   | 0.02         | 0.01         |    |    | <b>39.08</b> |    | 0.01        |     |   |     | 0.01 |   |   |   |   |     |   | 0.01 |
| NG-ABEmax-KR-10 | 0.01                       |   | 0.01         | 0.01         |    |    | 0.02         |    | 0           |     |   |     | 0.01 |   |   |   |   |     |   | 0.01 |

|                 | A-to-G conversion rate (%) |   |      |      |   |    |      |    |      |   |     |   |      |   |   |   |     |   |     |      |
|-----------------|----------------------------|---|------|------|---|----|------|----|------|---|-----|---|------|---|---|---|-----|---|-----|------|
|                 | C                          | G | A3   | T    | T | A5 | C    | A8 | A10  | G | A12 | C | T    | C | C | T | A18 | C | A20 |      |
| Off target-2    |                            |   |      |      |   |    |      |    |      |   |     |   |      |   |   |   |     |   |     |      |
| NG-ABEmax-1     | 0.01                       |   | 0.01 | 0.01 |   |    | 0.02 |    | 0.01 |   |     |   | 0.01 |   |   |   |     |   |     | 0.01 |
| NG-ABEmax-2     | 0.01                       |   | 0.01 | 0.01 |   |    | 0.02 |    | 0.01 |   |     |   | 0.01 |   |   |   |     |   |     | 0.01 |
| NG-ABEmax-3     | 0.01                       |   | 0.01 | 0.01 |   |    | 0.02 |    | 0.01 |   |     |   | 0.01 |   |   |   |     |   |     | 0.01 |
| NG-ABEmax-4     | 0                          |   | 0.01 | 0.01 |   |    | 0.02 |    | 0.01 |   |     |   | 0.01 |   |   |   |     |   |     | 0.01 |
| NG-ABEmax-5     | 0.01                       |   | 0.01 | 0.01 |   |    | 0.02 |    | 0.01 |   |     |   | 0.01 |   |   |   |     |   |     | 0.02 |
| NG-ABEmax-6     | 0                          |   | 0.01 | 0.01 |   |    | 0.02 |    | 0.01 |   |     |   | 0.01 |   |   |   |     |   |     | 0.02 |
| NG-ABEmax-7     | 0                          |   | 0.01 | 0.01 |   |    | 0.02 |    | 0.01 |   |     |   | 0.01 |   |   |   |     |   |     | 0    |
| NG-ABEmax-8     | 0.01                       |   | 0    | 0.01 |   |    | 0    |    | 0.02 |   |     |   | 0.01 |   |   |   |     |   |     | 0.01 |
| NG-ABEmax-9     | 0.01                       |   | 0.01 | 0.01 |   |    | 0.01 |    | 0.01 |   |     |   | 0.01 |   |   |   |     |   |     | 0.01 |
| NG-ABEmax-10    | 0.01                       |   | 0.01 | 0.01 |   |    | 0.01 |    | 0.01 |   |     |   | 0.01 |   |   |   |     |   |     | 0.01 |
| NG-ABEmax-KR-1  | 0.01                       |   | 0.01 | 0.01 |   |    | 0.02 |    | 0.02 |   |     |   | 0.01 |   |   |   |     |   |     | 0.01 |
| NG-ABEmax-KR-2  | 0.01                       |   | 0.01 | 0.01 |   |    | 0.02 |    | 0.02 |   |     |   | 0.01 |   |   |   |     |   |     | 0.01 |
| NG-ABEmax-KR-3  | 0                          |   | 0.01 | 0.01 |   |    | 0.02 |    | 0.01 |   |     |   | 0.01 |   |   |   |     |   |     | 0.01 |
| NG-ABEmax-KR-4  | 0                          |   | 0.01 | 0.01 |   |    | 0.02 |    | 0.02 |   |     |   | 0.01 |   |   |   |     |   |     | 0.01 |
| NG-ABEmax-KR-5  | 0                          |   | 0.01 | 0.01 |   |    | 0.02 |    | 0.01 |   |     |   | 0    |   |   |   |     |   |     | 0.01 |
| NG-ABEmax-KR-6  | 0                          |   | 0.01 | 0.01 |   |    | 0.02 |    | 0.01 |   |     |   | 0.01 |   |   |   |     |   |     | 0.01 |
| NG-ABEmax-KR-7  | 0                          |   | 0.01 | 0.01 |   |    | 0.02 |    | 0.01 |   |     |   | 0.01 |   |   |   |     |   |     | 0.01 |
| NG-ABEmax-KR-8  | 0                          |   | 0.01 | 0.01 |   |    | 0.02 |    | 0.01 |   |     |   | 0.01 |   |   |   |     |   |     | 0.01 |
| NG-ABEmax-KR-9  | 0.01                       |   | 0.01 | 0.01 |   |    | 0.01 |    | 0.01 |   |     |   | 0.01 |   |   |   |     |   |     | 0.01 |
| NG-ABEmax-KR-10 | 0                          |   | 0.01 | 0.01 |   |    | 0.01 |    | 0.01 |   |     |   | 0.01 |   |   |   |     |   |     | 0.01 |

|                 | A-to-G conversion rate (%) |   |      |      |    |    |      |   |      |     |   |     |      |   |   |   |   |     |   |      |
|-----------------|----------------------------|---|------|------|----|----|------|---|------|-----|---|-----|------|---|---|---|---|-----|---|------|
|                 | C                          | C | A3   | T    | A5 | A6 | C    | T | G    | A10 | G | A12 | C    | T | C | T | T | A18 | C | A20  |
| Off target-3    |                            |   |      |      |    |    |      |   |      |     |   |     |      |   |   |   |   |     |   |      |
| NG-ABEmax-1     | 0.01                       |   | 0.01 | 0.01 |    |    | 0.01 |   | 0.01 |     |   |     | 0.02 |   |   |   |   |     |   | 0.01 |
| NG-ABEmax-2     | 0.01                       |   | 0.01 | 0.01 |    |    | 0.01 |   | 0.01 |     |   |     | 0.02 |   |   |   |   |     |   | 0.01 |
| NG-ABEmax-3     | 0.01                       |   | 0.01 | 0.01 |    |    | 0.01 |   | 0.01 |     |   |     | 0.02 |   |   |   |   |     |   | 0.01 |
| NG-ABEmax-4     | 0.01                       |   | 0.01 | 0.01 |    |    | 0.01 |   | 0.01 |     |   |     | 0.01 |   |   |   |   |     |   | 0.01 |
| NG-ABEmax-5     | 0.01                       |   | 0.01 | 0.01 |    |    | 0.01 |   | 0.01 |     |   |     | 0.01 |   |   |   |   |     |   | 0.01 |
| NG-ABEmax-6     | 0                          |   | 0.01 | 0.01 |    |    | 0.01 |   | 0.02 |     |   |     | 0.01 |   |   |   |   |     |   | 0.01 |
| NG-ABEmax-7     | 0.01                       |   | 0.01 | 0.02 |    |    | 0.01 |   | 0.02 |     |   |     | 0.02 |   |   |   |   |     |   | 0.02 |
| NG-ABEmax-8     | 0.01                       |   | 0    | 0.01 |    |    | 0.01 |   | 0.01 |     |   |     | 0.01 |   |   |   |   |     |   | 0.01 |
| NG-ABEmax-9     | 0.01                       |   | 0.01 | 0.01 |    |    | 0.01 |   | 0.01 |     |   |     | 0.02 |   |   |   |   |     |   | 0.01 |
| NG-ABEmax-10    | 0.01                       |   | 0    | 0.01 |    |    | 0.01 |   | 0.01 |     |   |     | 0.01 |   |   |   |   |     |   | 0.01 |
| NG-ABEmax-KR-1  | 0.01                       |   | 0    | 0.01 |    |    | 0.01 |   | 0.01 |     |   |     | 0.01 |   |   |   |   |     |   | 0.01 |
| NG-ABEmax-KR-2  | 0.01                       |   | 0.01 | 0.01 |    |    | 0.01 |   | 0.01 |     |   |     | 0.01 |   |   |   |   |     |   | 0.01 |
| NG-ABEmax-KR-3  | 0.01                       |   | 0.01 | 0.01 |    |    | 0    |   | 0.02 |     |   |     | 0.02 |   |   |   |   |     |   | 0.01 |
| NG-ABEmax-KR-4  | 0.01                       |   | 0.01 | 0.01 |    |    | 0.01 |   | 0.01 |     |   |     | 0.01 |   |   |   |   |     |   | 0.01 |
| NG-ABEmax-KR-5  | 0.01                       |   | 0.01 | 0.01 |    |    | 0.01 |   | 0.01 |     |   |     | 0.01 |   |   |   |   |     |   | 0.01 |
| NG-ABEmax-KR-6  | 0.01                       |   | 0.01 | 0.01 |    |    | 0.01 |   | 0.01 |     |   |     | 0.01 |   |   |   |   |     |   | 0.01 |
| NG-ABEmax-KR-7  | 0.01                       |   | 0.01 | 0.01 |    |    | 0.01 |   | 0.01 |     |   |     | 0.01 |   |   |   |   |     |   | 0.01 |
| NG-ABEmax-KR-8  | 0.01                       |   | 0.01 | 0.01 |    |    | 0.01 |   | 0.01 |     |   |     | 0.01 |   |   |   |   |     |   | 0.01 |
| NG-ABEmax-KR-9  | 0.01                       |   | 0.01 | 0.01 |    |    | 0.01 |   | 0.01 |     |   |     | 0.01 |   |   |   |   |     |   | 0.01 |
| NG-ABEmax-KR-10 | 0.01                       |   | 0.01 | 0.01 |    |    | 0.01 |   | 0.01 |     |   |     | 0.01 |   |   |   |   |     |   | 0.01 |

|              | A-to-G conversion rate (%) |    |    |   |    |    |   |    |   |     |   |     |   |   |   |   |   |     |   |     |
|--------------|----------------------------|----|----|---|----|----|---|----|---|-----|---|-----|---|---|---|---|---|-----|---|-----|
|              | C                          | A2 | A3 | T | A5 | A6 | C | A8 | G | A10 | G | A12 | C | T | C | T | T | A18 | C | A20 |
| Off target-4 |                            |    |    |   |    |    |   |    |   |     |   |     |   |   |   |   |   |     |   |     |
| NG-ABEmax-1  | 0                          |    | 0  | 0 |    |    | 0 |    | 0 |     |   |     | 0 |   |   |   |   |     |   |     |

**Supplementary Fig. 14 Off-target of NG-ABEmax and NG-ABEmax-KR at mouse *Try* gene.**

Four mice harboring the edited A3 base from each group have been selected. Six off-target sites (labeled with Off target-#) were selected for off-target test. Off-target editing efficiencies are in red.

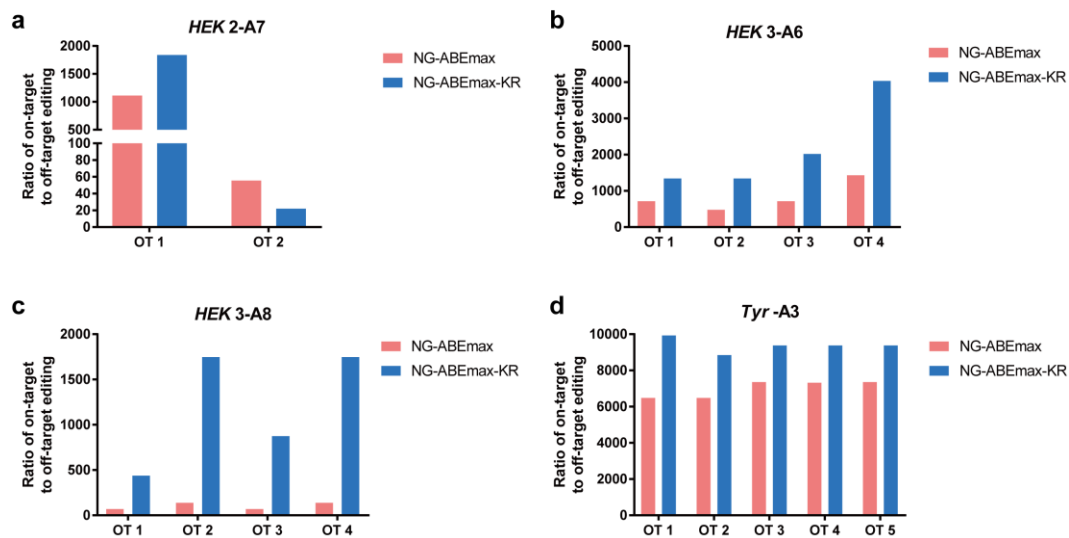

**Supplementary Fig. 15 Higher ratio of on-target to off-target editing of NG-ABEmax-KR at human endogenous gene and mouse *Try* gene.**

On-target and off-target editing efficiency of NG-ABEmax and NG-ABEmax-KR at different sites were performed. Data from OT site represent the ratio of on-target to off-target editing. The data of sites from human endogenous genes (*HEK 2*, *HEK 3*) are showed (a, b and c). The *Try* on-target and off-target editing ratio from four mice are summarized (d).

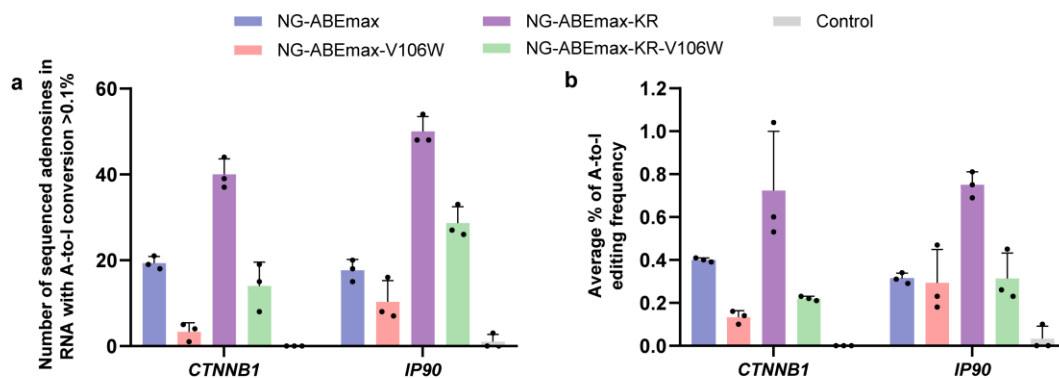

**Supplementary Fig. 16 RNA off-target editing of NG-ABEmax-KR and variants with two mutations (E59A in TadA, V106W in TadA\*).**

**a** The number of adenosines converted to inosine at a detectable level (>0.1%) of the corresponding mRNA. **b**. Average A-to-I RNA editing frequencies by NG-ABEmax, NG-ABEmax-KR and variants with AW (E59A in TadA, V106W in TadA\*). Error bars indicate mean  $\pm$  s.d ( $n = 3$  independent experiments).

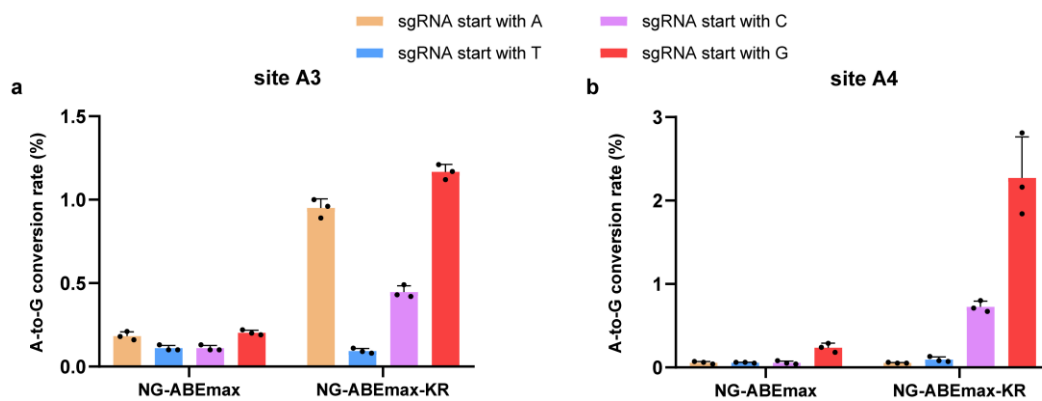

**Supplementary Fig. 17 Base editing efficiencies for sgRNA started with different first nucleotide.**

**a** The editing efficiencies of NG-ABEmax and NG-ABEmax-KR with four sgRNA targeted at position A3 in the EGFP (Figure 1d) in HEK-293 cells. **b** The editing efficiencies at position A4 in HEK-293 cells. Error bars indicate mean  $\pm$  s.d ( $n = 3$  independent experiments).

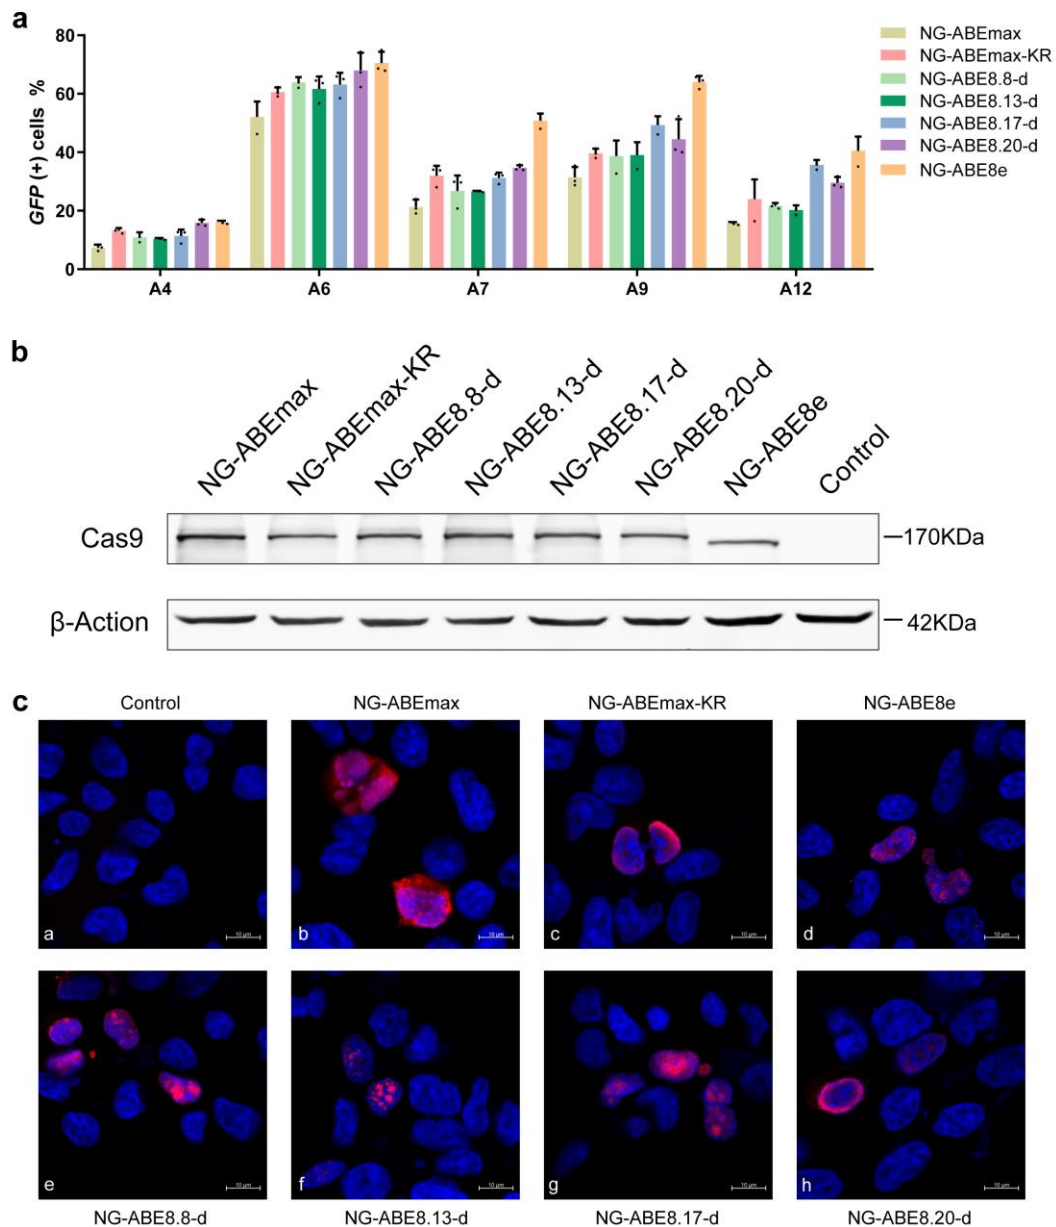

**Supplementary Fig. 18 Activity, protein expression levels and nuclear localization of ABE variants.**

**a** Base editing induced by ABEs at different A base in EGFP. Error bars indicate mean  $\pm$  s.d. ( $n = 3$  independent experiments). **b** Western blot analysis of ABE variants via the recognition with specific Cas9 antibody. **c** Nuclear localization of ABE variants. HEK-293 cells were transfected with the plasmids, fixed 24 hours post-transfection and stained with the antibody against Cas9 (red). DAPI (blue) indicated the nucleus. Scale bar is 10  $\mu$ m.



**Supplementary Table. 1 Mutations information of randomly picked variants.**

| Colony ID | Mutation number/575 bp | Colony ID | Mutation number /730 bp |
|-----------|------------------------|-----------|-------------------------|
| S-L1-1    | 2                      | S-L2-1    | 1                       |
| S-L1-2    | 3                      | S-L2-2    | 6                       |
| S-L1-3    | Deletion               | S-L2-3    | 4                       |
| S-L1-4    | 1                      | S-L2-4    | 2                       |
| S-L1-5    | 2                      | S-L2-5    | 5                       |
| S-L1-6    | 5                      | S-L2-6    | 6                       |
| S-L1-7    | 4                      | S-L2-7    | 2                       |
| S-L1-8    | 1                      | S-L2-8    | 1                       |
| S-L1-9    | 2                      | S-L2-9    | 3                       |
| S-L1-10   | 4                      | S-L2-10   | 3                       |
| S-L1-11   | 1                      | S-L2-11   | 1                       |
| S-L1-12   | 1                      | S-L2-12   | 3                       |
| S-L1-13   | 3                      | S-L2-13   | 3                       |
| S-L1-14   | 3                      | S-L2-14   | 3                       |
| S-L1-15   | 1                      | S-L2-15   | 6                       |
| S-L1-16   | 5                      | S-L2-16   | Deletion                |
| S-L1-17   | 5                      | S-L2-17   | 8                       |
| S-L1-18   | 5                      | S-L2-18   | 1                       |
| S-L1-19   | 1                      | S-L2-19   | 6                       |
| S-L1-20   | 5                      | S-L2-20   | 3                       |

**Supplementary Table. 2 Summary of mutations information.**

| NG-ABEmax variants | Mut1                 | Mut2               | Mut3                 | Mut4               | Mut5               | Mut6                | Mut7  | Mut8  |
|--------------------|----------------------|--------------------|----------------------|--------------------|--------------------|---------------------|-------|-------|
| L1-42              | L145L<br>(c.1083G>A) | Q154R              |                      |                    |                    |                     |       |       |
| L1-50              | R101R<br>(c.951C>G)  | E134D              |                      |                    |                    |                     |       |       |
| L1-60              | R101S                | D139G              | E140K                |                    |                    |                     |       |       |
| L1-66              | E3A                  | M61L               | T79S                 | T83T<br>(c.897A>G) | S97S<br>(c.939T>A) | V102V<br>(c.954G>A) | M126L | M151L |
| L1-79              | N37S                 | R98R<br>(c.942G>A) | T133S                | Q154R              |                    |                     |       |       |
| L1-98              | E9K                  | Q154R              |                      |                    |                    |                     |       |       |
| L1-240             | E43V                 | W45R               | I136I<br>(c.1056C>T) | M151L              | D167E              |                     |       |       |
| L1-244             | N127K                |                    |                      |                    |                    |                     |       |       |
| L2-106             | R150G                |                    |                      |                    |                    |                     |       |       |
| L2-151             | V33M                 | Q71Ter             | N127K                |                    |                    |                     |       |       |
| L2-156             | A106S                | N127K              | E155K                |                    |                    |                     |       |       |
| L2-159             | Y81Y<br>(c.297T>C)   | Q159H              |                      |                    |                    |                     |       |       |

**Supplementary Table. 3 No toxic effect of NG-ABEmax-KR for mouse development.**

| Methods                      | No. of injected embryos | No. of two-cell embryos (%) | No. of blastocysts (%) | No. of transferred embryos | No. of offsprings (%)  |
|------------------------------|-------------------------|-----------------------------|------------------------|----------------------------|------------------------|
| H <sub>2</sub> O injection   | 40                      | 39 (97.5) <sup>a</sup>      | 30 (76.9) <sup>b</sup> | NA                         | NA                     |
| NG-ABEmax mRNA+ Tyr sgRNA    | 36                      | 35 (97.2) <sup>a</sup>      | 26 (74.3) <sup>b</sup> | NA                         | NA                     |
| NG-ABEmax-KR mRNA+ Tyr sgRNA | 39                      | 37 (94.9) <sup>a</sup>      | 34 (91.9) <sup>b</sup> | NA                         | NA                     |
| H <sub>2</sub> O injection   | 56                      | 54 (96.4) <sup>a</sup>      | NA                     | 54                         | 21 (38.9) <sup>c</sup> |
| NG-ABEmax mRNA+ Tyr sgRNA    | 32                      | 30 (93.8) <sup>a</sup>      | NA                     | 30                         | 12 (40) <sup>c</sup>   |
| NG-ABEmax-KR mRNA+ Tyr sgRNA | 63                      | 60 (95.2) <sup>a</sup>      | NA                     | 60                         | 22 (36.7) <sup>c</sup> |

NA: not applicable.

<sup>a</sup>Calculated from the number of injected embryos.

<sup>b</sup>Calculated from the number of developed two-cell stage embryos.

<sup>c</sup>Calculated from the number of transferred embryos.

**Supplementary Table. 4 Primers used to generate different EGFP variants.**

| Primer Description | Primer sequence (5'-3')              |
|--------------------|--------------------------------------|
| fwd_EGFP           | CAGGTGTCGTGAGGGAATTTCGATTATCGCC      |
| rev_dEGFP1         | CGTAGGTCAGCGACGACACCAGCGAGGGCTAGGGCA |
| fwd_dEGFP1         | TAGCCCTCGCTGGTGTGCTCGCTGACCTACGG     |
| rev_dEGFP2         | CGACACCAGCGAGGGTCAGGGCACGGG          |
| fwd_dEGFP2         | CCCTGACCCTCGCTGGTGTGCTCGCTGA         |
| rev_EGFP-variant   | GTAGGTCAGCGACGACACCAGCGAGGGCCAGGGCA  |
| fwd_EGFP-variant   | TGGCCCTCGCTGGTGTGCTCGCTGACCTACGG     |
| rev_EGFP           | CCCTAGATGCATGCGGATCCTTCGAACTAG       |

**Supplementary Table. 5 Primers used to generate sgRNA plasmids targeting different sites of dEGFP1 or dEGFP2.**

| Primer Description | Primer sequence (5'-3')    |
|--------------------|----------------------------|
| dEGFP1-A3 F        | CACCCTAGCCCTCGCTGGTGTCTGT  |
| dEGFP1-A3 R        | AAACACGACACCAGCGAGGGCTAG   |
| dEGFP1-A6 F        | CACCGCCCTAGCCCTCGCTGGTGT   |
| dEGFP1-A6 R        | AAACACACCAGCGAGGGCTAGGGC   |
| dEGFP1-A9 F        | CACCCGTGCCCTAGCCCTCGCTGG   |
| dEGFP1-A9 R        | AAACCCAGCGAGGGCTAGGGCACG   |
| dEGFP1-A11 F       | CACCCCGTGCCCTAGCCCTCGCT    |
| dEGFP1-A11 R       | AAACAGCGAGGGCTAGGGCACGGG   |
| dEGFP1-A12 F       | CACCGCCCGTGCCCTAGCCCTCGC   |
| dEGFP1-A12 R       | AAACGCGAGGGCTAGGGCACGGGC   |
| dEGFP1-A15 F       | CACCGCTGCCCGTGCCCTAGCCCT   |
| dEGFP1-A15 R       | AAACAGGGCTAGGGCACGGGCAGC   |
| dEGFP2-A1 F        | CACCACCCTCGCTGGTGTCTGTCTGC |
| dEGFP2-A1 R        | AAACGCGACGACACCAGCGAGGGT   |
| dEGFP2-A4 F        | CACCCTGACCCTCGCTGGTGTCTGT  |
| dEGFP2-A4 R        | AAACACGACACCAGCGAGGGTCAG   |
| dEGFP2-A7 F        | CACCGCCCTGACCCTCGCTGGTGT   |
| dEGFP2-A7 R        | AAACACACCAGCGAGGGTCAGGGC   |
| dEGFP2-A10 F       | CACCCGTGCCCTGACCCTCGCTGG   |
| dEGFP2-A10 R       | AAACCCAGCGAGGGTCAGGGCACG   |
| dEGFP2-A13 F       | CACCGCCCGTGCCCTGACCCTCGC   |
| dEGFP2-A13 R       | AAACGCGAGGGTCAGGGCACGGGC   |
| dEGFP2-A16 F       | CACCGCTGCCCGTGCCCTGACCCT   |
| dEGFP2-A16 R       | AAACAGGGTCAGGGCACGGGCAGC   |

**Supplementary Table. 6 Primers used to generate sgRNA plasmid targeting MCS site in the HEK293-PME cell line.**

| Primer Description | Primer sequence (5'-3')  |
|--------------------|--------------------------|
| MCS F              | CACCTTCTGCAGTCGACGGTACCG |
| MCS R              | AAACCGGTACCGTCGACTGCAGAA |

**Supplementary Table. 7 Primers used to generate sgRNA plasmids targeting different genomic loci.**

| Primer Description | Primer sequence (5'-3')  |
|--------------------|--------------------------|
| site1 (HEK2) F     | CACCGAACACAAAGCATAGACTGC |
| site1 (HEK2) R     | AAACGCAGTCTATGCTTTGTGTTT |
| site2 F            | CACCGAGTATGAGGCATAGACTGC |
| site2 R            | AAACGCAGTCTATGCCTCATACTC |
| site3 F            | CACCGTCAAGAAAGCAGAGACTGC |
| site3 R            | AAACGCAGTCTCTGCTTTCTTGAC |
| site5 F            | CACCGATGAGATAATGATGAGTCA |
| site5 R            | AAACTGACTCATCATTATCTCATC |
| site6 F            | CACCGGATTGACCCAGGCCAGGGC |
| site6 R            | AAACGCCCTGGCCTGGGTCAATCC |
| site7 F            | CACCGAATACTAAGCATAGACTCC |
| site7 R            | AAACGGAGTCTATGCTTAGTATTC |
| site8 F            | CACCGTAAACAAAGCATAGACTGA |
| site8 R            | AAACTCAGTCTATGCTTTGTTTAC |
| site9 F            | CACCGAAGACCAAGGATAGACTGC |
| site9 R            | AAACGCAGTCTATCCTTGGTCTTC |
| site10 F           | CACCGAACATAAAGAATAGAATGA |
| site10 R           | AAACTCATTCTATTCTTTATGTTT |
| site12 F           | CACCGTAGAAAAAGTATAGACTGC |
| site12 R           | AAACGCAGTCTATACTTTTTCTAC |
| site13 F           | CACCGAAGATAGAGAATAGACTGC |
| site13 R           | AAACGCAGTCTATTCTCTATCTTC |
| site14 F           | CACCGGCTAAAGACCATAGACTGT |
| site14 R           | AAACACAGTCTATGGTCTTTAGCC |
| site15 F           | CACCGTCTAGAAAGCTTAGACTGC |
| site15 R           | AAACGCAGTCTAAGCTTTCTAGAC |
| site17 F           | CACCGACAAAGAGGAAGAGAGACG |
| site17 R           | AAACCGTCTCTCTTCCTCTTTGTC |
| site18 F           | CACCACACACACACTTAGAATCTG |
| site18 R           | AAACCAGATTCTAAGTGTGTGTGT |
| HEK3 F             | CACCGGCCAGACTGAGCACGTGA  |
| HEK3 R             | AAACTCACGTGCTCAGTCTGGGCC |
| HEK4 F             | CACCGGCACTGCGGCTGGAGGTGG |
| HEK4 R             | AAACCCACCTCCAGCCGCAGTGCC |
| HBG1/2 F           | CACCGTGGGGAAGGGGCCCCCAAG |
| HBG1/2 R           | AAACCTTGGGGGCCCTTCCCCAC  |
| Tyr F              | CACCCATAACAGAGACTCTTACA  |
| Tyr R              | AAACTGTAAGAGTCTCTGTTATGG |

**Supplementary Table. 8 Primers used to identify key mutations for L1-60, L1-98 and L2-156.**

| Primer Description | Primer sequence (5'-3')                 |
|--------------------|-----------------------------------------|
| fwd_BamHI          | TCTGGAGGATCTAGCGGAGGATCC                |
| rev_60-1           | CAAACACCACGC <b>I</b> GCCGATC           |
| fwd_60-1           | GGC <b>A</b> GCGTGGTGT <b>T</b> TTGGCGT |
| rev_60-2           | CGGCACATTCA <b>C</b> CTGCCAGG           |
| fwd_60-2           | GCAG <b>G</b> TGAATGTGCCGCCCT           |
| rev_60-3           | CGGCACATT <b>I</b> ATCTGCCAGG           |
| fwd_60-3           | GCAGAT <b>A</b> AATGTGCCGCCCT           |
| rev_60-4           | CAAACACCACGCGGCCGATC                    |
| fwd_60-4           | GGCCGCGTGGTGT <b>T</b> TTGGCGT          |
| rev_98-1           | TCAGGGCATGTCTCATCCAGTACT <b>I</b> GTGG  |
| fwd_98-1           | CCAC <b>A</b> AGTACTGGATGAGACATGC       |
| rev_98-2           | GCATTGAACACC <b>C</b> GTCTAGGCA         |
| fwd_98-2           | TAGAC <b>G</b> GGTGTTCATGCTCAGA         |
| rev_ABEmax         | CCTTGGCCATCTCGTTGCTGAAGATCT             |
| fwd_TadA-mut       | TCAGATCCGCTAGAGATCCGCGG                 |
| rev_W156-1         | CCGTG <b>A</b> TCCGAACACCACTCT          |
| fwd_W156-1         | GTGGTGTTCGGAT <b>I</b> CACGGGAC         |
| rev_W156-2         | GGT <b>G</b> CTTCATGCCGGGGTGGT          |
| fwd_W156-2         | ACCCCGGCATGAA <b>G</b> CACCGG           |
| rev_W156-3         | TGATCT <b>I</b> CTGTCTCCGCATTC          |
| fwd_W156-3         | TGCGGAGACAG <b>A</b> AGATCAAGG          |
| rev_W156-4         | TGATCTCCTGTCTCCGCATTC                   |
| fwd_W156-4         | TGCGGAGACAGGAGATCAAGG                   |
| rev_W156-5         | TGGTTCATGCCGGGGTGGTGC                   |
| fwd_W156-5         | CCACCCGGCATGAACCACC                     |
| rev_W156-6         | CCGTGCTCCGAACACCACTCT                   |
| fwd_W156-6         | GTGGTGTTCGGAGCACGGGAC                   |
| rev_TadA-mut       | TGGGAAAACCTCCACCTCAGAGGATCC             |

**Supplementary Table. 9 Primers used to generate NG-ABEmax-R<sup>127</sup> and NG-ABEmax H<sup>127</sup>.**

| Primer Description | Primer sequence (5'-3')                           |
|--------------------|---------------------------------------------------|
| fwd_TadA-mut       | TCAGATCCGCTAGAGATCCGCGG                           |
| rev_N127R          | GGT <b>G</b> CC <b>T</b> CATGCCGGGGTGGT           |
| fwd_N127R          | ACCCCGGCATGA <b>G</b> G <b>C</b> ACCGG            |
| rev_N127H          | GGT <b>G</b> <b>T</b> <b>G</b> CATGCCGGGGTGGT     |
| fwd_N127H          | ACCCCGGCATG <b>C</b> <b>A</b> <b>C</b> CACCGGGTGG |
| rev_TadA-mut       | TGGGAAAACCTCCACCTCAGAGGATCC                       |

**Supplementary Table. 10 Primers used to generate 2 NG-ABEmax variants libraries.**

| Primer Description | Primer sequence (5'-3')     |
|--------------------|-----------------------------|
| fwd_TadA*-mut      | TCCGCCACACCAGAGAGCTCCG      |
| rev_TadA*-mut      | TCAGAGCCAGAGGAGCCTCCGCTAGAT |
| fwd_TadA-mut       | TCAGATCCGCTAGAGATCCGCGG     |
| rev_TadA-mut       | TGGGAAACTCCACCTCAGAGGATCC   |

**Supplementary Table. 11 Primers used for fragments amplification.**

| Primer Description | Primer sequence (5'-3')                   |
|--------------------|-------------------------------------------|
| fwd_MCS            | CAGGGAGCTCAAAATGGAGG                      |
| rev_MCS            | TGCAGATGAACTTCAGGGTC                      |
| fwd_site1 (HEK2)   | GGAGTGAGTACGGTGTGCAGACCTGGCTGAGCTAACTG    |
| rev_site1 (HEK2)   | GAGTTGGATGCTGGATGGCCCATCTGTCAAACCTGTGCG   |
| fwd_site2          | GGAGTGAGTACGGTGTGCGCTTTTCAGCTAGAGGGAACCT  |
| rev_site2          | GAGTTGGATGCTGGATGGCTGAAATGCTGTGCGTGTCT    |
| fwd_site3          | GGAGTGAGTACGGTGTGCGGTTTCCTGTCTTCCCTTTCCC  |
| rev_site3          | GAGTTGGATGCTGGATGGCCGACAGCCAGTGGTTAAGT    |
| fwd_site5          | GGAGTGAGTACGGTGTGCAAGGAACTCAGGTCCAGGGAA   |
| rev_site5          | GAGTTGGATGCTGGATGGTGAGAGCAGGGACCACATCTA   |
| fwd_site6          | GGAGTGAGTACGGTGTGCGCATGCATTTGTAGGCTTGATGC |
| rev_site6          | GAGTTGGATGCTGGATGGAGGAAAAGCTGTCCTGCGAC    |
| fwd_site7          | GGAGTGAGTACGGTGTGCTCCACCGCCTTGTTTACTGCT   |
| rev_site7          | GAGTTGGATGCTGGATGGTAGGTTTGCATAGACCTGCCC   |
| fwd_site8          | GGAGTGAGTACGGTGTGCCCTGTTCTAAAGCCCACC      |
| rev_site8          | GAGTTGGATGCTGGATGGACTGGTTCTGTTTGTGGCCA    |
| fwd_site9          | GGAGTGAGTACGGTGTGCGGCCCAATGACACCACATGA    |
| rev_site9          | GAGTTGGATGCTGGATGGGGAACAGGCAGCGTATTGCT    |
| fwd_site10         | GGAGTGAGTACGGTGTGCTCCACCTCCCCACTTCTCTT    |
| rev_site10         | GAGTTGGATGCTGGATGGGGTGAAATGAGCAAGGCACA    |
| fwd_site12         | GGAGTGAGTACGGTGTGCCAGGTGATGGAAAGCATTGCC   |
| rev_site12         | GAGTTGGATGCTGGATGGACCCATGTGCCTGACATAGG    |
| fwd_site13         | GGAGTGAGTACGGTGTGCCTTCTCTTTCTCTCCCCACCC   |
| rev_site13         | GAGTTGGATGCTGGATGGTCACTTCAGCCCAGGAGTAT    |
| fwd_site14         | GGAGTGAGTACGGTGTGCTCTAACCTGTGTGACACTTGGCA |
| rev_site14         | GAGTTGGATGCTGGATGGGAACCTGAAGCCTTTCCCCA    |
| fwd_site15         | GGAGTGAGTACGGTGTGCAACTAGGTGGCTTCAGAGGC    |
| rev_site15         | GAGTTGGATGCTGGATGGGCACTCAGCTAGACTTAACTCCC |
| fwd_site17         | GGAGTGAGTACGGTGTGCCCTGATTCCAAGGAGATTGCCA  |
| rev_site17         | GAGTTGGATGCTGGATGGTCCCTCCTCTGCGTGAATTTG   |
| fwd_site18         | GGAGTGAGTACGGTGTGCGCATTACCTGGGAGCCTGTT    |
| rev_site18         | GAGTTGGATGCTGGATGGAACCTTCAGCGGGCATCAGAA   |
| fwd_HEK2-off1      | GGAGTGAGTACGGTGTGCGTCCAGATAATCAGAGTGTGG   |
| rev_HEK2-off1      | GAGTTGGATGCTGGATGGCTTGTGAAACAGAAATGTCAG   |
| fwd_HEK2-off2      | GGAGTGAGTACGGTGTGCGGTACTCGAGTGTATTTCAGCC  |
| rev_HEK2-off2      | GAGTTGGATGCTGGATGGGAGCAGTGAGTTTGGGCACT    |
| fwd_HEK3           | GGAGTGAGTACGGTGTGCTGCATTTGTAGGCTTGATGC    |
| rev_HEK3           | GAGTTGGATGCTGGATGGACATACTAGCCCCTGTCTAG    |
| fwd_HEK3-off1      | GGAGTGAGTACGGTGTGCTCCCCTGTTGACCTGGAGAA    |
| rev_HEK3-off1      | GAGTTGGATGCTGGATGGTACTTGCCCTGACCAGAGGT    |
| fwd_HEK3-off2      | GGAGTGAGTACGGTGTGCGAAGGGGAAGGAGACTTAGTG   |
| rev_HEK3-off2      | GAGTTGGATGCTGGATGGTTGGTGTGACAGGGAGCAA     |

|               |                                                  |
|---------------|--------------------------------------------------|
| fwd_HEK3-off3 | GGAGTGAGTACGGTGTGCTGCTCATCTTAATCTGCTCAGCC        |
| rev_HEK3-off3 | GAGTTGGATGCTGGATGGTCCTAGCACTTTGGAAGGTCG          |
| fwd_HEK3-off4 | GGAGTGAGTACGGTGTGCAAAGGAGCAGCTCTTCCTGG           |
| rev_HEK3-off4 | GAGTTGGATGCTGGATGGGTCTGCACCATCTCCCACAA           |
| fwd_HEK4      | GGAGTGAGTACGGTGTGCAAGATGGCTGACAAAGGCCG           |
| rev_HEK4      | GAGTTGGATGCTGGATGGGCCCCCACTGTAGTCACACA           |
| fwd_HEK4-off1 | GGAGTGAGTACGGTGTGCGACTCATAGCTGGGGCTGAA           |
| rev_HEK4-off1 | GAGTTGGATGCTGGATGGGTATCACTGTCCCCTTGCACT          |
| fwd_HEK4-off2 | GGAGTGAGTACGGTGTGCAAGAGGCTGCCCATGAGAGC           |
| rev_HEK4-off2 | GAGTTGGATGCTGGATGGTTTGGCAATGGAGGCATTGG           |
| fwd_HEK4-off3 | GGAGTGAGTACGGTGTGCTGGGATGGAATCACCTGCAC           |
| rev_HEK4-off3 | GAGTTGGATGCTGGATGGCTCGGTTCCCTCCACAACACA          |
| fwd_HEK4-off4 | GGAGTGAGTACGGTGTGCGCAGGGGAGGGATAAAGCAG           |
| rev_HEK4-off4 | GAGTTGGATGCTGGATGGCACGGGAAGGACAGGAGAAG           |
| fwd_Mouse-Tyr | GGAGTGAGTACGGTGTGCCACCGCCCTCTTTTGGAAGT           |
| rev_Mouse-Tyr | GAGTTGGATGCTGGATGGGGCAACTGAGCTTTACCTGAC          |
| fwd_CTNNB1    | GGAGTGAGTACGGTGTGCATTTGATGGAGTTGGACATGGCC        |
| rev_CTNNB1    | GAGTTGGATGCTGGATGGCCAGCTACTTGTCTTGAGTGAAGG       |
| fwd_IP90      | GGAGTGAGTACGGTGTGCCTGGTTGACCAATCTGTGGTGAATAG     |
| rev_IP90      | GAGTTGGATGCTGGATGGGTACGTACTIONCAGGCTCATCATCTAACC |

**Supplementary Table. 12 Primers used for next-generation sequencing.**

| Primer | Primer sequence (5'-3')                                     |
|--------|-------------------------------------------------------------|
| 1F-1   | ACTCTTTCCCTACACGACGCTCTTCCGATCTgcttGCGTtggagtgagtacggtgtgc  |
| 1F-2   | ACTCTTTCCCTACACGACGCTCTTCCGATCTgcttGTAGtggagtgagtacggtgtgc  |
| 1F-3   | ACTCTTTCCCTACACGACGCTCTTCCGATCTgcttACGctggagtgagtacggtgtgc  |
| 1F-4   | ACTCTTTCCCTACACGACGCTCTTCCGATCTgcttCTCGtggagtgagtacggtgtgc  |
| 1F-5   | ACTCTTTCCCTACACGACGCTCTTCCGATCTgcttGCTctggagtgagtacggtgtgc  |
| 1F-6   | ACTCTTTCCCTACACGACGCTCTTCCGATCTgcttAGTctggagtgagtacggtgtgc  |
| 1F-7   | ACTCTTTCCCTACACGACGCTCTTCCGATCTgcttCGACtggagtgagtacggtgtgc  |
| 1F-8   | ACTCTTTCCCTACACGACGCTCTTCCGATCTgcttGATGtggagtgagtacggtgtgc  |
| 1F-9   | ACTCTTTCCCTACACGACGCTCTTCCGATCTgcttATACtggagtgagtacggtgtgc  |
| 1F-10  | ACTCTTTCCCTACACGACGCTCTTCCGATCTgcttCACAtggagtgagtacggtgtgc  |
| 1F-11  | ACTCTTTCCCTACACGACGCTCTTCCGATCTgcttGTGctggagtgagtacggtgtgc  |
| 1F-12  | ACTCTTTCCCTACACGACGCTCTTCCGATCTgcttACTAtggagtgagtacggtgtgc  |
| 2F     | AATGATACGGCGACCACCGAGATCTACACTCTTTCCCTACACGACGCTCTT         |
| 1R-A   | GACTGGAGTTCAGACGTGTGCTCTTCCGATCTctgtGCGTtgagttggatgctggatgg |
| 1R-B   | GACTGGAGTTCAGACGTGTGCTCTTCCGATCTctgtGTAGtgagttggatgctggatgg |
| 1R-C   | GACTGGAGTTCAGACGTGTGCTCTTCCGATCTctgtACGctgagttggatgctggatgg |
| 1R-D   | GACTGGAGTTCAGACGTGTGCTCTTCCGATCTctgtCTCGtgagttggatgctggatgg |
| 1R-E   | GACTGGAGTTCAGACGTGTGCTCTTCCGATCTctgtGCTctgagttggatgctggatgg |
| 1R-F   | GACTGGAGTTCAGACGTGTGCTCTTCCGATCTctgtAGTctgagttggatgctggatgg |
| 1R-G   | GACTGGAGTTCAGACGTGTGCTCTTCCGATCTctgtCGACtgagttggatgctggatgg |
| 1R-H   | GACTGGAGTTCAGACGTGTGCTCTTCCGATCTctgtGATGtgagttggatgctggatgg |
| 2R     | CAAGCAGAAGACGGCATACGAGATCGCTGATCGTACTGGAGTTCAGACGTGTGCTCTT  |





|          |         |         |         |         |         |         |         |         |         |         |         |         |         |         |         |         |         |         |         |         |
|----------|---------|---------|---------|---------|---------|---------|---------|---------|---------|---------|---------|---------|---------|---------|---------|---------|---------|---------|---------|---------|
| Mutant   | L1-781  | L1-782  | L1-783  | L1-784  | L1-785  | L1-786  | L1-787  | L1-788  | L1-789  | L1-790  | L1-791  | L1-792  | L1-793  | L1-794  | L1-795  | L1-796  | L1-797  | L1-798  | L1-799  | L1-800  |
| EGFP(+)% | 1.53    | 3.84    | 1.25    | 2.56    | 0.02    | 0.6     | 2       | 3.82    | 4.05    | 0.88    | 0.05    | 2.14    | 3.23    | 0.05    | 0       | 3.46    | 0.05    | 3.45    | 0.02    | 3.52    |
| Mutant   | L1-801  | L1-802  | L1-803  | L1-804  | L1-805  | L1-806  | L1-807  | L1-808  | L1-809  | L1-810  | L1-811  | L1-812  | L1-813  | L1-814  | L1-815  | L1-816  | L1-817  | L1-818  | L1-819  | L1-820  |
| EGFP(+)% | 1.42    | 3.86    | 1.99    | 1.72    | 0.04    | 3.89    | 0       | 0.08    | 1.63    | 0.1     | 7.28    | 3.39    | 0.33    | 1.74    | 5.12    | 1.39    | 2.56    | 0.08    | 0.01    | 3.4     |
| Mutant   | L1-821  | L1-822  | L1-823  | L1-824  | L1-825  | L1-826  | L1-827  | L1-828  | L1-829  | L1-830  | L1-831  | L1-832  | L1-833  | L1-834  | L1-835  | L1-836  | L1-837  | L1-838  | L1-839  | L1-840  |
| EGFP(+)% | 3.88    | 0.02    | 0.82    | 0.58    | 0.02    | 0       | 2.26    | 2.63    | 3.78    | 0.03    | 0.01    | 3.37    | 0.74    | 0.04    | 3.6     | 0       | 3.14    | 3.17    | 0.04    | 5.08    |
| Mutant   | L1-841  | L1-842  | L1-843  | L1-844  | L1-845  | L1-846  | L1-847  | L1-848  | L1-849  | L1-850  | L1-851  | L1-852  | L1-853  | L1-854  | L1-855  | L1-856  | L1-857  | L1-858  | L1-859  | L1-860  |
| EGFP(+)% | 0       | 4.55    | 0.81    | 0.28    | 1.9     | 4.27    | 2.61    | 0.56    | 3.52    | 3.69    | 3.89    | 0       | 2.59    | 0       | 0.33    | 2.11    | 0       | 1.26    | 2.15    | 0       |
| Mutant   | L1-861  | L1-862  | L1-863  | L1-864  | L1-865  | L1-866  | L1-867  | L1-868  | L1-869  | L1-870  | L1-871  | L1-872  | L1-873  | L1-874  | L1-875  | L1-876  | L1-877  | L1-878  | L1-879  | L1-880  |
| EGFP(+)% | 1.27    | 0.02    | 0.22    | 3.02    | 3.46    | 0       | 0       | 3.3     | 3.43    | 3.34    | 0.04    | 1.92    | 1.36    | 4.12    | 2.38    | 0.13    | 0       | 3.54    | 0       | 0.04    |
| Mutant   | L1-881  | L1-882  | L1-883  | L1-884  | L1-885  | L1-886  | L1-887  | L1-888  | L1-889  | L1-890  | L1-891  | L1-892  | L1-893  | L1-894  | L1-895  | L1-896  | L1-897  | L1-898  | L1-899  | L1-900  |
| EGFP(+)% | 0       | 3.36    | 1.9     | 0.53    | 2.63    | 1.02    | 0.03    | 1.62    | 1.91    | 6.87    | 3.15    | 1.15    | 2.74    | 0.13    | 0       | 3.73    | 0.02    | 0.03    | 0.15    | 0.66    |
| Mutant   | L1-901  | L1-902  | L1-903  | L1-904  | L1-905  | L1-906  | L1-907  | L1-908  | L1-909  | L1-910  | L1-911  | L1-912  | L1-913  | L1-914  | L1-915  | L1-916  | L1-917  | L1-918  | L1-919  | L1-920  |
| EGFP(+)% | 0.9     | 0       | 0.02    | 0.01    | 1.26    | 2.91    | 1.15    | 4.09    | 0.02    | 3.12    | 3.11    | 2.94    | 1.38    | 0.14    | 1.15    | 0.01    | 1.85    | 2.65    | 0.11    | 2.35    |
| Mutant   | L1-921  | L1-922  | L1-923  | L1-924  | L1-925  | L1-926  | L1-927  | L1-928  | L1-929  | L1-930  | L1-931  | L1-932  | L1-933  | L1-934  | L1-935  | L1-936  | L1-937  | L1-938  | L1-939  | L1-940  |
| EGFP(+)% | 0.71    | 0.05    | 0.14    | 1.3     | 2.45    | 0.01    | 2.67    | 0.25    | 1.51    | 2.22    | 1.15    | 0.84    | 1.13    | 1.47    | 0.05    | 1.08    | 0.17    | 0       | 0       | 0.01    |
| Mutant   | L1-941  | L1-942  | L1-943  | L1-944  | L1-945  | L1-946  | L1-947  | L1-948  | L1-949  | L1-950  | L1-951  | L1-952  | L1-953  | L1-954  | L1-955  | L1-956  | L1-957  | L1-958  | L1-959  | L1-960  |
| EGFP(+)% | 0       | 0.01    | 2.39    | 0.12    | 1.53    | 3.91    | 0.51    | 0.29    | 0.39    | 1.96    | 0.39    | 0.01    | 0       | 1.05    | 2.72    | 3.79    | 1.67    | 0       | 0       | 0       |
| Mutant   | L1-961  | L1-962  | L1-963  | L1-964  | L1-965  | L1-966  | L1-967  | L1-968  | L1-969  | L1-970  | L1-971  | L1-972  | L1-973  | L1-974  | L1-975  | L1-976  | L1-977  | L1-978  | L1-979  | L1-980  |
| EGFP(+)% | 3.31    | 0       | 0.04    | 0.02    | 0.24    | 3.85    | 0.05    | 4.32    | 0.11    | 0.01    | 1.61    | 0.69    | 4.2     | 4.36    | 4.39    | 4.12    | 3.83    | 0.05    | 0.13    | 1.47    |
| Mutant   | L1-981  | L1-982  | L1-983  | L1-984  | L1-985  | L1-986  | L1-987  | L1-988  | L1-989  | L1-990  | L1-991  | L1-992  | L1-993  | L1-994  | L1-995  | L1-996  | L1-997  | L1-998  | L1-999  | L1-1000 |
| EGFP(+)% | 4.87    | 0.01    | 0       | 0.99    | 5.84    | 0.01    | 0       | 0.02    | 0       | 0.03    | 2.06    | 0.07    | 4.66    | 3.61    | 0.15    | 0.7     | 3.58    | 0.13    | 3.97    | 0.21    |
| Mutant   | L1-1001 | L1-1002 | L1-1003 | L1-1004 | L1-1005 | L1-1006 | L1-1007 | L1-1008 | L1-1009 | L1-1010 | L1-1011 | L1-1012 | L1-1013 | L1-1014 | L1-1015 | L1-1016 | L1-1017 | L1-1018 | L1-1019 | L1-1020 |
| EGFP(+)% | 0       | 4.16    | 0       | 1.75    | 1.91    | 0.57    | 0       | 1.79    | 0.13    | 0       | 0.6     | 0.02    | 0.04    | 1.84    | 1.74    | 0       | 2.16    | 0.62    | 1.21    | 0.20    |
| Mutant   | L1-1021 | L1-1022 | L1-1023 | L1-1024 | L1-1025 | L1-1026 | L1-1027 | L1-1028 | L1-1029 | L1-1030 | L1-1031 | L1-1032 | L1-1033 | L1-1034 | L1-1035 | L1-1036 | L1-1037 | L1-1038 | L1-1039 | L1-1040 |
| EGFP(+)% | 0.64    | 0       | 0.02    | 0       | 6.3     | 5.36    | 0.35    | 0.6     | 0.02    | 7.67    | 8.22    | 2.66    | 3.3     | 4.54    | 0.14    | 2.28    | 1.58    | 2.11    | 0.48    | 0.48    |
| Mutant   | L1-1041 | L1-1042 | L1-1043 | L1-1044 | L1-1045 | L1-1046 | L1-1047 | L1-1048 | L1-1049 | L1-1050 | L1-1051 | L1-1052 | L1-1053 | L1-1054 | L1-1055 | L1-1056 | L1-1057 | L1-1058 | L1-1059 | L1-1060 |
| EGFP(+)% | 0.3     | 0.71    | 0.01    | 0.37    | 0       | 0.22    | 0       | 1.27    | 0       | 0       | 3.89    | 4.38    | 0.6     | 0.05    | 0       | 1.41    | 1.1     | 0       | 2.92    | 0       |
| Mutant   | L1-1061 | L1-1062 | L1-1063 | L1-1064 | L1-1065 | L1-1066 | L1-1067 | L1-1068 | L1-1069 | L1-1070 | L1-1071 | L1-1072 | L1-1073 | L1-1074 | L1-1075 | L1-1076 | L1-1077 | L1-1078 | L1-1079 | L1-1080 |
| EGFP(+)% | 0.07    | 2.8     | 0       | 6.55    | 1.59    | 0.11    | 0.19    | 3       | 1.1     | 1.8     | 0       | 0.05    | 0.07    | 2.99    | 0.03    | 0       | 2.79    | 0.45    | 1.91    | 2.92    |
| Mutant   | L1-1081 | L1-1082 | L1-1083 | L1-1084 | L1-1085 | L1-1086 | L1-1087 | L1-1088 | L1-1089 | L1-1090 | L1-1091 | L1-1092 | L1-1093 | L1-1094 | L1-1095 | L1-1096 | L1-1097 | L1-1098 | L1-1099 | L1-1100 |
| EGFP(+)% | 2.64    | 3.98    | 2.97    | 4.4     | 1.68    | 2.2     | 0       | 1.9     | 5.02    | 0.84    | 0.3     | 4.33    | 0       | 0       | 0       | 0       | 3.98    | 0.06    | 0.23    | 1.89    |
| Mutant   | L1-1101 | L1-1102 | L1-1103 | L1-1104 | L1-1105 | L1-1106 | L1-1107 | L1-1108 | L1-1109 | L1-1110 | L1-1111 | L1-1112 | L1-1113 | L1-1114 | L1-1115 | L1-1116 | L1-1117 | L1-1118 | L1-1119 | L1-1120 |
| EGFP(+)% | 1.5     | 0       | 0       | 0       | 1.72    | 0       | 1.95    | 1.3     | 0.91    | 1.71    | 2.81    | 2.13    | 3.93    | 0       | 0       | 3.67    | 0       | 0       | 0       | 0       |
| Mutant   | L1-1121 | L1-1122 | L1-1123 | L1-1124 | L1-1125 | L1-1126 | L1-1127 | L1-1128 | L1-1129 | L1-1130 | L1-1131 | L1-1132 | L1-1133 | L1-1134 | L1-1135 | L1-1136 | L1-1137 | L1-1138 | L1-1139 | L1-1140 |
| EGFP(+)% | 0       | 0       | 0       | 0       | 2.59    | 0       | 0.07    | 0.29    | 0.24    | 0.08    | 1119    | 0.36    | 0.04    | 0.05    | 0.04    | 0.19    | 6.77    | 0.16    | 5.55    | 4.81    |
| Mutant   | L1-1141 | L1-1142 | L1-1143 | L1-1144 | L1-1145 | L1-1146 | L1-1147 | L1-1148 | L1-1149 | L1-1150 | L1-1151 | L1-1152 | L1-1153 | L1-1154 | L1-1155 | L1-1156 | L1-1157 | L1-1158 | L1-1159 | L1-1160 |
| EGFP(+)% | 0       | 0.31    | 0.39    | 6.64    | 0.17    | 3.08    | 5.71    | 3.01    | 1.43    | 5.77    | 1.61    | 2.15    | 2.59    | 1.2     | 0.26    | 1.52    | 0.1     | 0       | 2.36    | 0.62    |
| Mutant   | L1-1161 | L1-1162 | L1-1163 | L1-1164 | L1-1165 | L1-1166 | L1-1167 | L1-1168 | L1-1169 | L1-1170 | L1-1171 | L1-1172 | L1-1173 | L1-1174 | L1-1175 | L1-1176 | L1-1177 | L1-1178 | L1-1179 | L1-1180 |
| EGFP(+)% | 2.49    | 4.08    | 0.08    | 0.01    | 5.19    | 0       | 0.03    | 4.4     | 0.52    | 0       | 0.03    | 4.47    | 0.37    | 0       | 0.58    | 3.31    | 0.08    | 0       | 0.05    | 0.63    |
| Mutant   | L1-1181 | L1-1182 | L1-1183 | L1-1184 | L1-1185 | L1-1186 | L1-1187 | L1-1188 | L1-1189 | L1-1190 | L1-1191 | L1-1192 | L1-1193 | L1-1194 | L1-1195 | L1-1196 | L1-1197 | L1-1198 | L1-1199 | L1-1200 |
| EGFP(+)% | 0.08    | 5.88    | 7.94    | 0.04    | 2.24    | 4.29    | 1.98    | 3.91    | 5.72    | 2.46    | 0.37    | 0.37    | 0.18    | 1.31    | 0.05    | 3.86    | 0.01    | 2.24    | 0.37    | 5.52    |
| Mutant   | L1-1201 | L1-1202 | L1-1203 | L1-1204 | L1-1205 | L1-1206 | L1-1207 | L1-1208 | L1-1209 | L1-1210 | L1-1211 | L1-1212 | L1-1213 | L1-1214 | L1-1215 | L1-1216 | L1-1217 | L1-1218 | L1-1219 | L1-1220 |
| EGFP(+)% | 0.03    | 3.11    | 3.18    | 4.27    | 0.49    | 1.24    | 4.01    | 0       | 4.08    | 1.95    | 3.83    | 0.09    | 5.34    | 0.02    | 0.05    | 0.21    | 3.85    | 2.75    | 0.44    | 0.02    |
| Mutant   | L1-1221 | L1-1222 | L1-1223 | L1-1224 | L1-1225 | L1-1226 | L1-1227 | L1-1228 | L1-1229 | L1-1230 | L1-1231 | L1-1232 | L1-1233 | L1-1234 | L1-1235 | L1-1236 | L1-1237 | L1-1238 | L1-1239 | L1-1240 |
| EGFP(+)% | 2.15    | 1.48    | 2.91    | 0       | 0       | 0.09    | 0       | 0.06    | 2.79    | 0       | 0       | 2.92    | 0       | 1.41    | 0       | 0.02    | 0.41    | 0.02    | 0.88    | 0.09    |
| Mutant   | L1-1241 | L1-1242 | L1-1243 | L1-1244 | L1-1245 | L1-1246 | L1-1247 | L1-1248 | L1-1249 | L1-1250 | L1-1251 | L1-1252 | L1-1253 | L1-1254 | L1-1255 | L1-1256 | L1-1257 | L1-1258 | L1-1259 | L1-1260 |
| EGFP(+)% | 2.54    | 0.43    | 3.93    | 0.01    | 2.17    | 1.46    | 0.34    | 0.69    | 0.04    | 0       | 0.06    | 0.03    | 4.79    | 5.31    | 0.42    | 0.96    | 0.01    | 0.29    | 6.77    | 0       |
| Mutant   | L1-1261 | L1-1262 | L1-1263 | L1-1264 | L1-1265 | L1-1266 | L1-1267 | L1-1268 | L1-1269 | L1-1270 | L1-1271 | L1-1272 | L1-1273 | L1-1274 | L1-1275 | L1-1276 | L1-1277 | L1-1278 | L1-1279 | L1-1280 |
| EGFP(+)% | 0.03    | 4.75    | 4.72    | 0.5     | 0.06    | 0.04    | 2.57    | 0.12    | 0.01    | 0.99    | 1.4     | 0.99    | 0.11    | 0.05    | 6.66    | 1.08    | 0       | 5.74    | 5.35    | 0.15    |
| Mutant   | L1-1281 | L1-1282 | L1-1283 | L1-1284 | L1-1285 | L1-1286 | L1-1287 | L1-1288 | L1-1289 | L1-1290 | L1-1291 | L1-1292 | L1-1293 | L1-1294 | L1-1295 | L1-1296 | L1-1297 | L1-1298 | L1-1299 | L1-1300 |
| EGFP(+)% | 1.92    | 2.57    | 0.32    | 3.92    | 0.58    | 3.74    | 0       | 0.02    | 0.1     | 3.04    | 0.02    | 2.82    | 0.24    | 0       | 5.32    | 3.86    | 0.38    | 0.55    | 0       | 3.08    |
| Mutant   | L1-1301 | L1-1302 | L1-1303 | L1-1304 | L1-1305 | L1-1306 | L1-1307 | L1-1308 | L1-1309 | L1-1310 | L1-1311 | L1-1312 | L1-1313 | L1-1314 | L1-1315 | L1-1316 | L1-1317 | L1-1318 | L1-1319 | L1-1320 |
| EGFP(+)% | 0.36    | 1.86    | 0       | 2.29    | 0       | 0.5     | 0       | 0       | 0       | 0.11    | 0.77    | 0.03    | 1.79    | 0       | 0.04    | 0       | 0.37    | 2.07    | 0.89    | 0.89    |
| Mutant   | L1-1321 | L1-1322 | L1-1323 | L1-1324 | L1-1325 | L1-1326 | L1-1327 | L1-1328 | L1-1329 | L1-1330 | L1-1331 | L1-1332 | L1-1333 | L1-1334 | L1-1335 | L1-1336 | L1-1337 | L1-1338 | L1-1339 | L1-1340 |
| EGFP(+)% | 1.04    | 0.44    | 0       | 0.14    | 0       | 1.71    | 0       | 3.26    | 1.79    | 1       | 1.34    | 0       | 0       | 0       | 4.74    | 3.65    | 2.61    | 0.5     | 1.13    | 0.33    |
| Mutant   | L1-1341 | L1-1342 | L1-1343 | L1-1344 | L1-1345 | L1-1346 | L1-1347 | L1-1348 | L1-1349 | L1-1350 | L1-1351 | L1-1352 | L1-1353 | L1-1354 | L1-1355 | L1-1356 | L1-1357 | L1-1358 | L1-1359 | L1-1360 |
| EGFP(+)% | 0.02    | 0       | 4.32    | 2.37    | 0       | 0.59    | 0.06    | 2.04    | 0.8     | 0       | 4.34    | 2.19    | 7.57    | 4.24    | 3.51    | 0       | 0.18    | 2.71    | 2.06    | 0.36    |
| Mutant   | L1-1361 | L1-1362 | L1-1363 | L1-1364 | L1-1365 | L1-1366 | L1-1367 | L1-1368 | L1-1369 | L1-1370 | L1-1371 | L1-1372 | L1-1373 | L1-1374 | L1-1375 | L1-1376 | L1-1377 | L1-1378 | L1-1379 | L1-1380 |
| EGFP(+)% | 2.43    | 1.16    | 2.97    | 0       | 2.25    | 0       | 0.33    | 0       | 0       | 3.44    | 3.49    | 0       | 3.65    | 2.07    | 0.25    | 0       | 2.96    | 2.95    | 0.2     | 0       |
| Mutant   | L1-1381 | L1-1382 | L1-1383 | L1-1384 | L1-1385 | L1-1386 | L1-1387 | L1-1388 | L1-1389 | L1-1390 | L1-1391 | L1-1392 | L1-1393 | L1-1394 | L1-1395 | L1-1396 |         |         |         |         |
